# Supplementary material
Source: publisher site journal article supplement (https://www.spandidos-publications.com/5063/downloadSupplementary)
Supplement: Supplementary file 1 [file downloadSupplementary]

## Sheet: corResult
Table SIV. Expression correlations between ferroptosis-related genes and lncRNAs in pancreatic adenocarcinoma.
ferrGene	lncRNA	cor	P-value	Regulation
CISD1	AC127496.5	0.57298	6.40696e-17	postive
FADS2	AC127496.5	0.423292	3.939e-09	postive
ISCU	AC127496.5	0.40933	1.40142e-08	postive
GCH1	AC127496.5	0.458162	1.27126e-10	postive
SLC1A4	AC127496.5	0.471075	3.21992e-11	postive
ATP6V1G2	AC127496.5	0.532005	2.1418e-14	postive
GOT1	AC127496.5	0.400981	2.91298e-08	postive
MAP1LC3A	AC127496.5	0.50875	4.15223e-13	postive
GABARAPL2	AC127496.5	0.639512	7.42169e-22	postive
DPP4	AC127496.5	0.450576	2.77418e-10	postive
PEBP1	AC127496.5	0.545205	3.58881e-15	postive
NQO1	DNMBP-AS1	0.452208	2.34917e-10	postive
SLC40A1	DNMBP-AS1	0.521692	8.20154e-14	postive
SRC	DNMBP-AS1	0.512375	2.65442e-13	postive
ACSL3	DNMBP-AS1	0.400397	3.0636e-08	postive
LURAP1L	DNMBP-AS1	0.405857	1.90464e-08	postive
HSD17B11	DNMBP-AS1	0.55879	5.25063e-16	postive
SP1	DNMBP-AS1	0.546717	2.91002e-15	postive
HNF4A	DNMBP-AS1	0.426922	2.80488e-09	postive
SCP2	DNMBP-AS1	0.442028	6.53348e-10	postive
KRAS	DNMBP-AS1	0.475864	1.90658e-11	postive
NCOA4	DNMBP-AS1	0.403983	2.2444e-08	postive
MAPK3	DNMBP-AS1	0.405954	1.88847e-08	postive
PRKAA1	DNMBP-AS1	0.591226	3.67534e-18	postive
ACVR1B	DNMBP-AS1	0.406326	1.82779e-08	postive
PHKG2	AC104463.2	0.550056	1.82495e-15	postive
EGLN2	AC104463.2	0.461902	8.59085e-11	postive
TAZ	AC104463.2	0.46594	5.59762e-11	postive
NQO1	LINC01133	0.539645	7.6897e-15	postive
MUC1	LINC01133	0.486969	5.47967e-12	postive
GPX2	LINC01133	0.458175	1.26944e-10	postive
ULK2	LINC01133	-0.403109	2.42192e-08	negative
OTUB1	AC107081.1	0.441978	6.56629e-10	postive
DRD4	AC107081.1	0.431118	1.88474e-09	postive
PHKG2	AC107081.1	0.626772	8.09536e-21	postive
TAZ	AC107081.1	0.552316	1.32666e-15	postive
NQO1	AC091043.1	0.40805	1.56988e-08	postive
FH	AC091043.1	0.414964	8.45614e-09	postive
NFS1	AC002511.2	0.554606	9.5799e-16	postive
ENPP2	AC002511.2	0.573943	5.53454e-17	postive
MT3	AC002511.2	0.75015	1.94072e-33	postive
BNIP3	AC002511.2	0.731486	4.38802e-31	postive
ASNS	AC002511.2	0.413937	9.27847e-09	postive
VLDLR	AC002511.2	0.763211	3.25708e-35	postive
ZNF419	AC002511.2	0.403449	2.35133e-08	postive
VEGFA	AC002511.2	0.509516	3.77942e-13	postive
RGS4	AC002511.2	0.885011	2.49154e-60	postive
SLC2A8	AC002511.2	0.458732	1.19788e-10	postive
ALOX12B	AC002511.2	0.630911	3.77029e-21	postive
ULK1	AC002511.2	0.532456	2.01752e-14	postive
ATG4D	AC002511.2	0.694112	6.47099e-27	postive
ULK2	AC002511.2	0.410744	1.23565e-08	postive
PEBP1	AC002511.2	0.450827	2.70425e-10	postive
SOCS1	AC002511.2	0.648106	1.3885e-22	postive
CDO1	AC002511.2	0.894133	2.6161e-63	postive
FBXW7	AC002511.2	0.579828	2.23777e-17	postive
LONP1	AC002511.2	0.619718	2.90079e-20	postive
CISD1	AC026167.1	0.511861	2.8292e-13	postive
GABPB1	AC026167.1	0.422262	4.33431e-09	postive
FTL	LINC01943	0.447335	3.84947e-10	postive
NNMT	LINC01943	0.491419	3.28256e-12	postive
NOX4	LINC01943	0.529952	2.80841e-14	postive
OTUB1	AC093732.1	0.425356	3.24904e-09	postive
AIFM2	AC093732.1	0.402827	2.48219e-08	postive
CHAC1	AC093732.1	0.447819	3.66659e-10	postive
RELA	AC093732.1	0.431768	1.7713e-09	postive
ACSF2	AC093732.1	0.416637	7.26528e-09	postive
PHKG2	AC093732.1	0.501865	9.57401e-13	postive
HSPB1	AC005632.3	0.453956	1.96395e-10	postive
OXSR1	MIR31HG	0.425139	3.31556e-09	postive
RELA	MIR31HG	0.40254	2.54476e-08	postive
AKR1C3	LINC02381	0.508933	4.06018e-13	postive
NQO1	LINC02381	0.546382	3.04896e-15	postive
SLC40A1	LINC02381	0.444426	5.1503e-10	postive
SRC	LINC02381	0.436917	1.07834e-09	postive
GPX2	LINC02381	0.604334	4.20738e-19	postive
MAPK3	LINC02381	0.42207	4.41206e-09	postive
ACVR1B	LINC02381	0.402073	2.65006e-08	postive
ISCU	PIK3IP1-DT	0.428195	2.48765e-09	postive
GABPB1	PIK3IP1-DT	0.518256	1.27009e-13	postive
PHKG2	PIK3IP1-DT	0.479196	1.31772e-11	postive
MAP1LC3A	PIK3IP1-DT	0.484434	7.31285e-12	postive
ATM	PIK3IP1-DT	0.435208	1.27262e-09	postive
EGLN2	PIK3IP1-DT	0.417352	6.80685e-09	postive
TAZ	PIK3IP1-DT	0.539463	7.88228e-15	postive
GPX4	USP46-DT	-0.470984	3.25193e-11	negative
NFE2L2	USP46-DT	0.475878	1.90369e-11	postive
SLC40A1	USP46-DT	0.405243	2.01011e-08	postive
STAT3	USP46-DT	0.450695	2.74087e-10	postive
MTOR	USP46-DT	0.410172	1.30036e-08	postive
ZFP69B	USP46-DT	0.401533	2.77699e-08	postive
EIF2AK4	USP46-DT	0.448834	3.30971e-10	postive
IREB2	USP46-DT	0.533158	1.83812e-14	postive
RIPK1	USP46-DT	0.414371	8.92239e-09	postive
PIK3CA	USP46-DT	0.415422	8.11245e-09	postive
NCOA4	USP46-DT	0.486802	5.58499e-12	postive
SNX4	USP46-DT	0.419307	5.69232e-09	postive
MAPK1	USP46-DT	0.464015	6.87028e-11	postive
PRKAA1	USP46-DT	0.550813	1.64031e-15	postive
SIRT1	USP46-DT	0.468792	4.12202e-11	postive
ALOX12B	RASGRP3-AS1	0.41581	7.832e-09	postive
ALOXE3	RASGRP3-AS1	0.49946	1.27606e-12	postive
LONP1	RASGRP3-AS1	0.420483	5.10888e-09	postive
SETD1B	AC006449.2	0.434448	1.36951e-09	postive
GABPB1	AC006449.2	0.449407	3.12337e-10	postive
CHMP6	AC012306.2	0.451862	2.43355e-10	postive
SLC2A8	AC012306.2	0.466691	5.16554e-11	postive
HIC1	AC012306.2	0.428484	2.42063e-09	postive
HRAS	AC012306.2	0.429378	2.224e-09	postive
MAP1LC3A	AC012306.2	0.585352	9.40713e-18	postive
WIPI2	AC012306.2	0.434697	1.33702e-09	postive
ANO6	AC012306.2	-0.413698	9.48048e-09	negative
MTDH	AC012306.2	-0.407513	1.64625e-08	negative
CISD1	FLVCR1-DT	0.400602	3.00997e-08	postive
SETD1B	FLVCR1-DT	0.413332	9.79821e-09	postive
GABPB1	FLVCR1-DT	0.432118	1.71307e-09	postive
GABARAPL2	FLVCR1-DT	0.421568	4.62183e-09	postive
PEBP1	FLVCR1-DT	0.472147	2.86541e-11	postive
MUC1	AC010525.1	0.455661	1.64772e-10	postive
OTUB1	AC010525.1	0.420658	5.02716e-09	postive
RELA	AC010525.1	0.40913	1.42656e-08	postive
DRD4	AC010525.1	0.516763	1.53337e-13	postive
PHKG2	AC010525.1	0.562654	2.99041e-16	postive
TAZ	AC010525.1	0.637262	1.14121e-21	postive
PHKG2	AL138963.1	0.416353	7.45568e-09	postive
CISD1	AC012615.1	0.551651	1.45755e-15	postive
CHMP6	AC012615.1	0.409537	1.37597e-08	postive
SLC1A4	AC012615.1	0.450688	2.74268e-10	postive
ZNF419	AC012615.1	0.430908	1.92287e-09	postive
TUBE1	AC012615.1	0.409712	1.35462e-08	postive
SETD1B	AC012615.1	0.424355	3.5675e-09	postive
GABPB1	AC012615.1	0.587436	6.75494e-18	postive
HRAS	AC012615.1	0.432143	1.70894e-09	postive
ALOX12B	AC012615.1	0.403557	2.32929e-08	postive
PHKG2	AC012615.1	0.438677	9.08282e-10	postive
ATG4D	AC012615.1	0.469349	3.88158e-11	postive
MAP1LC3A	AC012615.1	0.564783	2.18612e-16	postive
GABARAPL2	AC012615.1	0.624551	1.21425e-20	postive
PEBP1	AC012615.1	0.543302	4.66568e-15	postive
ANO6	AC012615.1	-0.450356	2.83674e-10	negative
FLT3	LINC00987	0.449289	3.16096e-10	postive
ACVR1B	LINC00987	0.400543	3.02536e-08	postive
SLC3A2	AC012640.2	0.465272	6.01107e-11	postive
NFS1	AC012640.2	0.566287	1.74991e-16	postive
ENPP2	AC012640.2	0.561529	3.52592e-16	postive
ISCU	AC012640.2	0.430364	2.02512e-09	postive
GCH1	AC012640.2	0.579072	2.51626e-17	postive
MT3	AC012640.2	0.450485	2.79978e-10	postive
BNIP3	AC012640.2	0.471873	2.95234e-11	postive
SLC1A4	AC012640.2	0.46833	4.33215e-11	postive
VLDLR	AC012640.2	0.525505	5.01876e-14	postive
ZNF419	AC012640.2	0.400442	3.05181e-08	postive
ATP6V1G2	AC012640.2	0.530077	2.76246e-14	postive
RGS4	AC012640.2	0.566526	1.68888e-16	postive
SLC2A8	AC012640.2	0.548864	2.15706e-15	postive
SP1	AC012640.2	-0.408838	1.46409e-08	negative
YWHAE	AC012640.2	0.440233	7.79803e-10	postive
ALOX12B	AC012640.2	0.586281	8.11819e-18	postive
ULK1	AC012640.2	0.554437	9.81401e-16	postive
ATG4D	AC012640.2	0.574831	4.83339e-17	postive
MAP1LC3A	AC012640.2	0.537693	1.00142e-14	postive
GABARAPL2	AC012640.2	0.443959	5.39529e-10	postive
WIPI2	AC012640.2	0.533053	1.86383e-14	postive
ULK2	AC012640.2	0.416994	7.03307e-09	postive
PEBP1	AC012640.2	0.558403	5.55269e-16	postive
CDO1	AC012640.2	0.658223	1.79874e-23	postive
ANO6	AC012640.2	-0.456283	1.54509e-10	negative
BACH1	AC012640.2	-0.422489	4.24394e-09	negative
LONP1	AC012640.2	0.672915	8.00879e-25	postive
DDIT4	AC254633.1	0.510118	3.50937e-13	postive
SP1	AC254633.1	0.447499	3.78656e-10	postive
EGFR	AC254633.1	0.420263	5.21309e-09	postive
CISD1	LINC02352	0.555588	8.32463e-16	postive
ISCU	LINC02352	0.401307	2.83186e-08	postive
MT3	LINC02352	0.476968	1.68768e-11	postive
SLC1A4	LINC02352	0.645455	2.34194e-22	postive
ZNF419	LINC02352	0.402761	2.49644e-08	postive
ATP6V1G2	LINC02352	0.573963	5.51769e-17	postive
STMN1	LINC02352	0.472615	2.72305e-11	postive
YWHAE	LINC02352	0.413209	9.90736e-09	postive
GABPB1	LINC02352	0.598229	1.16895e-18	postive
HRAS	LINC02352	0.419363	5.66299e-09	postive
ATG4D	LINC02352	0.426299	2.97412e-09	postive
MAP1LC3A	LINC02352	0.623195	1.5525e-20	postive
GABARAPL2	LINC02352	0.705242	4.34445e-28	postive
PEBP1	LINC02352	0.588456	5.73878e-18	postive
CISD1	AC083880.1	0.424382	3.55868e-09	postive
NFS1	AC083880.1	0.547105	2.75738e-15	postive
CHMP6	AC083880.1	0.441123	7.14409e-10	postive
MT3	AC083880.1	0.44262	6.16209e-10	postive
BNIP3	AC083880.1	0.411312	1.17455e-08	postive
SLC1A4	AC083880.1	0.431132	1.88222e-09	postive
SLC2A8	AC083880.1	0.519106	1.14034e-13	postive
YWHAE	AC083880.1	0.5269	4.18694e-14	postive
GABPB1	AC083880.1	0.416469	7.3769e-09	postive
HRAS	AC083880.1	0.515272	1.84937e-13	postive
ALOX12B	AC083880.1	0.407793	1.60591e-08	postive
ULK1	AC083880.1	0.439009	8.79236e-10	postive
ATG4D	AC083880.1	0.526267	4.54647e-14	postive
MAP1LC3A	AC083880.1	0.541846	5.69675e-15	postive
GABARAPL2	AC083880.1	0.475751	1.9305e-11	postive
WIPI2	AC083880.1	0.562675	2.98138e-16	postive
PEBP1	AC083880.1	0.419699	5.4908e-09	postive
CDO1	AC083880.1	0.404094	2.22258e-08	postive
ANO6	AC083880.1	-0.462287	8.2492e-11	negative
BACH1	AC083880.1	-0.403102	2.42348e-08	negative
LONP1	AC083880.1	0.525883	4.77851e-14	postive
SETD1B	AC074029.3	0.438696	9.06585e-10	postive
FBXW7	AC074029.3	0.418367	6.20441e-09	postive
NFS1	AL049780.1	0.437448	1.02397e-09	postive
ZNF419	AL049780.1	0.508425	4.32097e-13	postive
TUBE1	AL049780.1	0.418823	5.95074e-09	postive
SETD1B	AL049780.1	0.419808	5.43612e-09	postive
ALOX12	AL049780.1	0.519075	1.14485e-13	postive
PHKG2	AL049780.1	0.465256	6.0212e-11	postive
ULK1	AL049780.1	0.499599	1.25514e-12	postive
ATG4D	AL049780.1	0.424089	3.65712e-09	postive
TAZ	AL049780.1	0.518798	1.18578e-13	postive
LONP1	AL049780.1	0.400295	3.09057e-08	postive
SLC1A4	AF131215.7	0.407726	1.61556e-08	postive
ATP6V1G2	AF131215.7	0.482022	9.60237e-12	postive
PEBP1	AF131215.7	0.513225	2.3883e-13	postive
ZNF419	PRANCR	0.454783	1.80396e-10	postive
GABPB1	PRANCR	0.432253	1.69105e-09	postive
HRAS	PRANCR	0.415455	8.08828e-09	postive
PHKG2	PRANCR	0.484151	7.55073e-12	postive
ULK1	PRANCR	0.474756	2.15392e-11	postive
ATG4D	PRANCR	0.402125	2.6382e-08	postive
MAP1LC3A	PRANCR	0.47427	2.27189e-11	postive
GABARAPL2	PRANCR	0.515349	1.83164e-13	postive
PEBP1	PRANCR	0.444833	4.94552e-10	postive
MUC1	LINC01389	0.403817	2.27701e-08	postive
SRC	LINC01389	0.452158	2.36128e-10	postive
OTUB1	LINC01389	0.414868	8.53021e-09	postive
GPX2	LINC01389	0.405121	2.03175e-08	postive
PHKG2	LINC01389	0.537406	1.04093e-14	postive
MAPK3	LINC01389	0.415176	8.29533e-09	postive
TAZ	LINC01389	0.436036	1.17461e-09	postive
MUC1	AC022211.1	0.448811	3.31725e-10	postive
SRC	AC022211.1	0.434755	1.32949e-09	postive
OXSR1	AC022211.1	0.402241	2.61182e-08	postive
DUOX2	AC022211.1	0.403744	2.29157e-08	postive
PRKAA1	AC022211.1	0.400972	2.91527e-08	postive
LPIN1	AC022211.1	0.455808	1.6228e-10	postive
ZNF419	AC084824.5	0.411569	1.14787e-08	postive
PHKG2	AC084824.5	0.513455	2.32074e-13	postive
EGLN2	AC084824.5	0.473728	2.41113e-11	postive
TAZ	AC084824.5	0.539272	8.08902e-15	postive
WIPI1	AL596442.2	0.542349	5.31733e-15	postive
DRD4	AC010618.2	0.411306	1.17518e-08	postive
PHKG2	AC010618.2	0.61465	7.11455e-20	postive
TAZ	AC010618.2	0.507672	4.73805e-13	postive
FTH1	AC087392.1	0.436552	1.11726e-09	postive
EGFR	AC087392.1	0.436932	1.07672e-09	postive
TP53	AL031985.3	0.403899	2.26087e-08	postive
MTOR	AL031985.3	0.415527	8.03629e-09	postive
NF2	AL031985.3	0.585593	9.0541e-18	postive
ZFP69B	AL031985.3	0.755165	4.16428e-34	postive
IREB2	AL031985.3	0.40424	2.19452e-08	postive
HIC1	AL031985.3	0.487827	4.96723e-12	postive
CYBB	AL031985.3	0.485165	6.73055e-12	postive
NRAS	AL031985.3	0.456109	1.57317e-10	postive
ZEB1	AL031985.3	0.422465	4.25354e-09	postive
EPAS1	AL031985.3	0.494138	2.3914e-12	postive
TLR4	AL031985.3	0.479869	1.22237e-11	postive
CISD1	PAXBP1-AS1	0.526898	4.18802e-14	postive
FADS2	PAXBP1-AS1	0.564451	2.29589e-16	postive
ISCU	PAXBP1-AS1	0.571351	8.19935e-17	postive
SESN2	PAXBP1-AS1	0.415607	7.97774e-09	postive
GCH1	PAXBP1-AS1	0.71779	1.77019e-29	postive
MT3	PAXBP1-AS1	0.430351	2.02768e-09	postive
BNIP3	PAXBP1-AS1	0.437548	1.01403e-09	postive
SLC1A4	PAXBP1-AS1	0.675792	4.26317e-25	postive
VLDLR	PAXBP1-AS1	0.533732	1.7029e-14	postive
ZNF419	PAXBP1-AS1	0.4464	4.22826e-10	postive
ATP6V1G2	PAXBP1-AS1	0.794119	6.522e-40	postive
TUBE1	PAXBP1-AS1	0.477379	1.61267e-11	postive
RGS4	PAXBP1-AS1	0.494866	2.19612e-12	postive
SETD1B	PAXBP1-AS1	0.427397	2.68216e-09	postive
STMN1	PAXBP1-AS1	0.407371	1.66694e-08	postive
CAPG	PAXBP1-AS1	-0.419383	5.65284e-09	negative
YWHAE	PAXBP1-AS1	0.50763	4.76257e-13	postive
GABPB1	PAXBP1-AS1	0.46487	6.27402e-11	postive
ULK1	PAXBP1-AS1	0.417003	7.02736e-09	postive
MAP1LC3A	PAXBP1-AS1	0.62873	5.64756e-21	postive
GABARAPL2	PAXBP1-AS1	0.719436	1.14833e-29	postive
ULK2	PAXBP1-AS1	0.536934	1.10925e-14	postive
DPP4	PAXBP1-AS1	0.427131	2.75011e-09	postive
PEBP1	PAXBP1-AS1	0.7701	3.3854e-36	postive
CDO1	PAXBP1-AS1	0.435387	1.25077e-09	postive
FBXW7	PAXBP1-AS1	0.428158	2.49622e-09	postive
OTUB1	AC104667.2	0.414249	9.02072e-09	postive
TUBE1	ACAP2-IT1	0.520845	9.13952e-14	postive
SETD1B	ACAP2-IT1	0.52454	5.68641e-14	postive
ALOX12	ACAP2-IT1	0.586473	7.87385e-18	postive
ATM	ACAP2-IT1	0.494964	2.1709e-12	postive
OTUB1	Z98884.1	0.401595	2.76231e-08	postive
DRD4	Z98884.1	0.44285	6.02343e-10	postive
GPX4	AL355001.2	0.441613	6.80712e-10	postive
OTUB1	AL355001.2	0.403246	2.39336e-08	postive
CHMP6	AL355001.2	0.54013	7.19909e-15	postive
MT3	AL355001.2	0.46401	6.87388e-11	postive
SLC2A8	AL355001.2	0.514095	2.14278e-13	postive
HRAS	AL355001.2	0.49924	1.31e-12	postive
KEAP1	AL355001.2	0.435469	1.24091e-09	postive
PHKG2	AL355001.2	0.438368	9.36135e-10	postive
ATG4D	AL355001.2	0.522165	7.71947e-14	postive
MAP1LC3A	AL355001.2	0.44513	4.80099e-10	postive
WIPI2	AL355001.2	0.471443	3.09363e-11	postive
SOCS1	AL355001.2	0.403458	2.34949e-08	postive
ANO6	AL355001.2	-0.478664	1.39816e-11	negative
LONP1	AL355001.2	0.456809	1.46319e-10	postive
OXSR1	AL442125.2	0.406802	1.75271e-08	postive
SLC2A12	AL442125.2	0.415289	8.21108e-09	postive
ALOX12	AL442125.2	0.464506	6.52139e-11	postive
KRAS	AL442125.2	0.40029	3.09198e-08	postive
NQO1	AC100861.1	0.440961	7.25939e-10	postive
MUC1	AC100861.1	0.444184	5.27572e-10	postive
FANCD2	AC100861.1	0.407903	1.59047e-08	postive
HELLS	AC100861.1	0.432731	1.61528e-09	postive
SRC	AC100861.1	0.486861	5.54792e-12	postive
PML	AC100861.1	0.422486	4.24502e-09	postive
OTUB1	AC100861.1	0.512495	2.61515e-13	postive
AIFM2	AC100861.1	0.428257	2.47306e-09	postive
GPX2	AC100861.1	0.420301	5.19491e-09	postive
VLDLR	AC100861.1	-0.407042	1.716e-08	negative
RELA	AC100861.1	0.585806	8.75327e-18	postive
ALOX5	AC100861.1	0.413382	9.75421e-09	postive
PHKG2	AC100861.1	0.438447	9.28967e-10	postive
ATG16L1	AC100861.1	0.469859	3.67352e-11	postive
ULK2	AC100861.1	-0.505552	6.13477e-13	negative
MAPK3	AC100861.1	0.445239	4.74919e-10	postive
YY1AP1	AC100861.1	0.413599	9.56602e-09	postive
HELLS	AF117829.1	0.443237	5.79661e-10	postive
PHKG2	AF117829.1	0.403858	2.26893e-08	postive
LINC00472	AF117829.1	0.638358	9.25799e-22	postive
SLC2A8	POLR2J4	0.407489	1.64969e-08	postive
PIK3CA	POLR2J4	-0.407854	1.59727e-08	negative
PHKG2	POLR2J4	0.407854	1.59729e-08	postive
WIPI2	POLR2J4	0.467223	4.87947e-11	postive
ANO6	POLR2J4	-0.457945	1.30031e-10	negative
BACH1	POLR2J4	-0.433637	1.48073e-09	negative
CD44	MANCR	0.42182	4.51522e-09	postive
SLC2A12	MANCR	0.448766	3.33231e-10	postive
AKR1C3	AC026471.3	0.413724	9.45871e-09	postive
CHAC1	AC026471.3	0.541536	5.9433e-15	postive
CXCL2	AC026471.3	0.469571	3.78954e-11	postive
PHKG2	AC026471.3	0.434929	1.30736e-09	postive
FLT3	AC148476.1	0.420409	5.1435e-09	postive
HELLS	AC007038.1	0.444595	5.06413e-10	postive
OTUB1	AC007038.1	0.469456	3.83716e-11	postive
ZNF419	AC007038.1	0.430457	2.00724e-09	postive
DRD4	AC007038.1	0.534669	1.50294e-14	postive
ACSF2	AC007038.1	0.412779	1.02977e-08	postive
PHKG2	AC007038.1	0.719523	1.12249e-29	postive
EGLN2	AC007038.1	0.433119	1.5563e-09	postive
TAZ	AC007038.1	0.602932	5.33084e-19	postive
FTL	BX284613.2	0.415778	7.85502e-09	postive
HIC1	BX284613.2	0.481216	1.05122e-11	postive
TLR4	BX284613.2	0.400216	3.11193e-08	postive
MUC1	SAMD12-AS1	0.411143	1.1924e-08	postive
SRC	SAMD12-AS1	0.44448	5.12289e-10	postive
PROM2	SAMD12-AS1	0.460481	9.97536e-11	postive
HSD17B11	SAMD12-AS1	0.497481	1.61397e-12	postive
SP1	SAMD12-AS1	0.473639	2.43464e-11	postive
EMC2	SAMD12-AS1	0.401997	2.66772e-08	postive
SCP2	SAMD12-AS1	0.449452	3.10897e-10	postive
ATG16L1	SAMD12-AS1	0.43852	9.22354e-10	postive
PRKAA1	SAMD12-AS1	0.452381	2.30809e-10	postive
IDH1	SAMD12-AS1	0.41881	5.95779e-09	postive
WIPI1	LINC00866	0.457355	1.38251e-10	postive
NFS1	HAR1B	0.417961	6.43913e-09	postive
VLDLR	HAR1B	0.425222	3.28988e-09	postive
ZNF419	HAR1B	0.421194	4.78417e-09	postive
RGS4	HAR1B	0.429934	2.10972e-09	postive
ELAVL1	HAR1B	0.416762	7.18313e-09	postive
ALOX12B	HAR1B	0.687119	3.31941e-26	postive
ULK1	HAR1B	0.444869	4.92783e-10	postive
ATG4D	HAR1B	0.569785	1.03792e-16	postive
MAP1LC3A	HAR1B	0.41177	1.1274e-08	postive
GABARAPL2	HAR1B	0.411449	1.16019e-08	postive
PEBP1	HAR1B	0.520214	9.9053e-14	postive
CDO1	HAR1B	0.573404	6.00742e-17	postive
LONP1	HAR1B	0.564212	2.37834e-16	postive
HELLS	AC021078.1	0.525727	4.87609e-14	postive
OXSR1	AC021078.1	0.495419	2.05809e-12	postive
DDIT4	AC021078.1	0.43758	1.01087e-09	postive
VEGFA	AC021078.1	0.405508	1.96385e-08	postive
RELA	AC021078.1	0.461467	8.99421e-11	postive
DRD4	AC021078.1	0.443745	5.51143e-10	postive
ALOX12	AC021078.1	0.53981	7.51929e-15	postive
SP1	AC021078.1	0.452788	2.2139e-10	postive
KRAS	AC021078.1	0.44212	6.47454e-10	postive
PHKG2	AC021078.1	0.453536	2.05054e-10	postive
ATG16L1	AC021078.1	0.550241	1.77787e-15	postive
LINC00472	AC021078.1	0.405813	1.91202e-08	postive
PRKAA1	AC021078.1	0.413201	9.91422e-09	postive
YY1AP1	AC021078.1	0.514607	2.00994e-13	postive
TAZ	AC021078.1	0.427978	2.53908e-09	postive
ALOXE3	AL359962.1	0.482163	9.45138e-12	postive
ENPP2	AC112236.2	0.588213	5.96593e-18	postive
GCH1	AC112236.2	0.4914	3.28997e-12	postive
SLC1A4	AC112236.2	0.47901	1.34533e-11	postive
VLDLR	AC112236.2	0.443943	5.40386e-10	postive
ATP6V1G2	AC112236.2	0.515342	1.83314e-13	postive
SETD1B	AC112236.2	0.405735	1.92509e-08	postive
ALOX12B	AC112236.2	0.470192	3.54356e-11	postive
ULK1	AC112236.2	0.431829	1.76106e-09	postive
ATG4D	AC112236.2	0.468009	4.48453e-11	postive
GABARAPL2	AC112236.2	0.442224	6.40813e-10	postive
ULK2	AC112236.2	0.445696	4.53696e-10	postive
PEBP1	AC112236.2	0.485769	6.2837e-12	postive
CDO1	AC112236.2	0.487636	5.07687e-12	postive
LONP1	AC112236.2	0.456221	1.55496e-10	postive
GPX4	AC010969.2	0.505007	6.55412e-13	postive
OTUB1	AC010969.2	0.434441	1.37045e-09	postive
HRAS	AC010969.2	0.432854	1.59637e-09	postive
KEAP1	AC010969.2	0.435107	1.28509e-09	postive
PHKG2	AC010969.2	0.503001	8.352e-13	postive
MAP1LC3A	AC010969.2	0.404622	2.12245e-08	postive
ANO6	AC010969.2	-0.411418	1.16345e-08	negative
EGLN2	AC010969.2	0.565598	1.93799e-16	postive
GPX4	CH17-340M24.3	0.548371	2.31101e-15	postive
CISD1	CH17-340M24.3	0.532932	1.89403e-14	postive
ISCU	CH17-340M24.3	0.449371	3.13465e-10	postive
SLC1A4	CH17-340M24.3	0.439344	8.5086e-10	postive
ATP6V1G2	CH17-340M24.3	0.505986	5.81979e-13	postive
SLC2A8	CH17-340M24.3	0.462718	7.88209e-11	postive
STMN1	CH17-340M24.3	0.451862	2.43371e-10	postive
YWHAE	CH17-340M24.3	0.488735	4.4754e-12	postive
KRAS	CH17-340M24.3	-0.429402	2.21891e-09	negative
HRAS	CH17-340M24.3	0.507958	4.57546e-13	postive
MAP1LC3A	CH17-340M24.3	0.677615	2.84899e-25	postive
GABARAPL2	CH17-340M24.3	0.583775	1.20684e-17	postive
WIPI2	CH17-340M24.3	0.476949	1.69116e-11	postive
PEBP1	CH17-340M24.3	0.539771	7.55874e-15	postive
ANO6	CH17-340M24.3	-0.450455	2.80846e-10	negative
EGLN2	CH17-340M24.3	0.447628	3.73767e-10	postive
BACH1	CH17-340M24.3	-0.434036	1.42493e-09	negative
SLC7A11	TTC39A-AS1	0.443314	5.7524e-10	postive
SESN2	TTC39A-AS1	0.434828	1.3202e-09	postive
ASNS	TTC39A-AS1	0.646764	1.81036e-22	postive
SLC2A8	TTC39A-AS1	0.403428	2.35552e-08	postive
ATG4D	TTC39A-AS1	0.411649	1.13964e-08	postive
WIPI1	TTC39A-AS1	0.408211	1.5477e-08	postive
EGFR	AL157932.1	0.434464	1.3673e-09	postive
NF2	GASAL1	0.405936	1.89144e-08	postive
YWHAE	GASAL1	0.409681	1.35839e-08	postive
SLC3A2	LINC01146	0.487449	5.18674e-12	postive
ENPP2	LINC01146	0.610107	1.56873e-19	postive
ISCU	LINC01146	0.427653	2.61823e-09	postive
SESN2	LINC01146	0.53085	2.49507e-14	postive
GCH1	LINC01146	0.591753	3.37494e-18	postive
VLDLR	LINC01146	0.424874	3.39887e-09	postive
ATP6V1G2	LINC01146	0.454856	1.79033e-10	postive
RGS4	LINC01146	0.598083	1.19743e-18	postive
ULK1	LINC01146	0.50077	1.0915e-12	postive
ATG4D	LINC01146	0.410768	1.23299e-08	postive
ULK2	LINC01146	0.43123	1.86476e-09	postive
PEBP1	LINC01146	0.509989	3.56535e-13	postive
CDO1	LINC01146	0.654007	4.25552e-23	postive
LONP1	LINC01146	0.44728	3.87072e-10	postive
DRD4	AC106028.3	0.417385	6.78637e-09	postive
PHKG2	AC106028.3	0.539258	8.10356e-15	postive
MIOX	AC106028.3	0.400076	3.14961e-08	postive
TAZ	AC106028.3	0.514794	1.96343e-13	postive
TSC22D3	AC012368.1	0.408398	1.52223e-08	postive
TNFAIP3	AC012368.1	0.404761	2.09678e-08	postive
ATM	AC012368.1	0.476071	1.86361e-11	postive
NFS1	AL589765.4	0.422626	4.19046e-09	postive
PHKG2	AL589765.4	0.433951	1.4367e-09	postive
ANO6	AL589765.4	-0.405359	1.98971e-08	negative
TAZ	AL589765.4	0.468452	4.27555e-11	postive
LONP1	AL589765.4	0.458797	1.18974e-10	postive
CISD1	SOCS2-AS1	0.528932	3.21087e-14	postive
FADS2	SOCS2-AS1	0.533813	1.6847e-14	postive
ENPP2	SOCS2-AS1	0.430011	2.09426e-09	postive
ISCU	SOCS2-AS1	0.660682	1.08169e-23	postive
SESN2	SOCS2-AS1	0.420396	5.14996e-09	postive
GCH1	SOCS2-AS1	0.719831	1.03479e-29	postive
BNIP3	SOCS2-AS1	0.437266	1.04229e-09	postive
SLC1A4	SOCS2-AS1	0.580263	2.09158e-17	postive
VLDLR	SOCS2-AS1	0.578086	2.93135e-17	postive
ATP6V1G2	SOCS2-AS1	0.705887	3.70056e-28	postive
TUBE1	SOCS2-AS1	0.496276	1.86061e-12	postive
RGS4	SOCS2-AS1	0.525564	4.98061e-14	postive
CAPG	SOCS2-AS1	-0.410572	1.25475e-08	negative
YWHAE	SOCS2-AS1	0.451977	2.40522e-10	postive
GABPB1	SOCS2-AS1	0.460193	1.02819e-10	postive
MAP1LC3A	SOCS2-AS1	0.562186	3.20286e-16	postive
GABARAPL2	SOCS2-AS1	0.649689	1.01375e-22	postive
ULK2	SOCS2-AS1	0.578433	2.77811e-17	postive
DPP4	SOCS2-AS1	0.492895	2.76498e-12	postive
PEBP1	SOCS2-AS1	0.731552	4.30802e-31	postive
CDO1	SOCS2-AS1	0.428641	2.38479e-09	postive
EPAS1	SOCS2-AS1	0.412755	1.03198e-08	postive
FBXW7	SOCS2-AS1	0.473339	2.51595e-11	postive
NQO1	AP001107.9	0.582772	1.41299e-17	postive
MUC1	AP001107.9	0.424657	3.46857e-09	postive
SLC40A1	AP001107.9	0.589882	4.56497e-18	postive
SRC	AP001107.9	0.509169	3.94384e-13	postive
GPX2	AP001107.9	0.614376	7.46474e-20	postive
CEBPG	AP001107.9	0.41315	9.95989e-09	postive
HSD17B11	AP001107.9	0.418254	6.26895e-09	postive
HNF4A	AP001107.9	0.615471	6.15931e-20	postive
MAPK3	AP001107.9	0.47891	1.36045e-11	postive
PRKAA1	AP001107.9	0.500215	1.16633e-12	postive
ACVR1B	AP001107.9	0.423485	3.86893e-09	postive
MT1G	LINC02568	0.438744	9.02325e-10	postive
ALB	LINC02568	0.589726	4.68083e-18	postive
GPT2	LINC02568	0.528118	3.57173e-14	postive
ELAVL1	LINC02568	-0.453959	1.96342e-10	negative
NFS1	AL133520.1	0.594063	2.31866e-18	postive
ENPP2	AL133520.1	0.464428	6.5759e-11	postive
ISCU	AL133520.1	0.421292	4.74117e-09	postive
GCH1	AL133520.1	0.504292	7.14653e-13	postive
MT3	AL133520.1	0.535655	1.3172e-14	postive
SLC1A4	AL133520.1	0.464811	6.31306e-11	postive
VLDLR	AL133520.1	0.52758	3.83194e-14	postive
ATP6V1G2	AL133520.1	0.500485	1.12933e-12	postive
RGS4	AL133520.1	0.522758	7.15362e-14	postive
SLC2A8	AL133520.1	0.553966	1.04954e-15	postive
YWHAE	AL133520.1	0.525252	5.18611e-14	postive
ULK1	AL133520.1	0.409108	1.42942e-08	postive
ATG4D	AL133520.1	0.489621	4.04105e-12	postive
MAP1LC3A	AL133520.1	0.53166	2.24203e-14	postive
GABARAPL2	AL133520.1	0.407734	1.61437e-08	postive
WIPI2	AL133520.1	0.621286	2.19033e-20	postive
PEBP1	AL133520.1	0.481008	1.07603e-11	postive
CDO1	AL133520.1	0.558614	5.38583e-16	postive
ANO6	AL133520.1	-0.4324	1.66736e-09	negative
LONP1	AL133520.1	0.534934	1.45065e-14	postive
VEGFA	AP005899.1	0.477995	1.50601e-11	postive
RELA	AP005899.1	0.40594	1.89075e-08	postive
ALOX12	AP005899.1	0.445126	4.80321e-10	postive
LINC00472	AP005899.1	0.453865	1.98259e-10	postive
YY1AP1	AP005899.1	0.437521	1.01679e-09	postive
DDIT4	FLJ31356	0.407659	1.62508e-08	postive
EGFR	FLJ31356	0.543341	4.64093e-15	postive
CISD1	AC018413.1	0.44915	3.20573e-10	postive
FADS2	AC018413.1	0.405684	1.9338e-08	postive
NFS1	AC018413.1	0.45724	1.39913e-10	postive
ISCU	AC018413.1	0.411819	1.1224e-08	postive
GCH1	AC018413.1	0.54062	6.73458e-15	postive
MT3	AC018413.1	0.405706	1.93016e-08	postive
SLC1A4	AC018413.1	0.577111	3.40682e-17	postive
VLDLR	AC018413.1	0.414117	9.12935e-09	postive
ATP6V1G2	AC018413.1	0.633876	2.16564e-21	postive
SLC2A8	AC018413.1	0.480978	1.0797e-11	postive
YWHAE	AC018413.1	0.470583	3.39648e-11	postive
NRAS	AC018413.1	-0.405998	1.88125e-08	negative
HRAS	AC018413.1	0.40695	1.73002e-08	postive
GOT1	AC018413.1	0.484845	6.97966e-12	postive
KEAP1	AC018413.1	0.440024	7.95947e-10	postive
ULK1	AC018413.1	0.401317	2.82951e-08	postive
ATG4D	AC018413.1	0.441777	6.69804e-10	postive
MAP1LC3A	AC018413.1	0.562649	2.99289e-16	postive
GABARAPL2	AC018413.1	0.610774	1.39798e-19	postive
WIPI2	AC018413.1	0.406845	1.74615e-08	postive
PEBP1	AC018413.1	0.654514	3.83967e-23	postive
LONP1	AC018413.1	0.48717	5.35485e-12	postive
FTL	AL356417.2	0.465523	5.85213e-11	postive
NNMT	AL356417.2	0.45686	1.45546e-10	postive
HIC1	AL356417.2	0.606435	2.94511e-19	postive
NOX4	AL356417.2	0.70748	2.4855e-28	postive
ALOX15B	AL356417.2	0.408874	1.45932e-08	postive
SLC3A2	AC006369.1	0.41209	1.09546e-08	postive
NFS1	AC006369.1	0.448605	3.38697e-10	postive
ENPP2	AC006369.1	0.528091	3.58433e-14	postive
GCH1	AC006369.1	0.602991	5.27747e-19	postive
MT3	AC006369.1	0.619253	3.15162e-20	postive
BNIP3	AC006369.1	0.709403	1.53196e-28	postive
SLC1A4	AC006369.1	0.456291	1.5437e-10	postive
VLDLR	AC006369.1	0.728897	8.98084e-31	postive
RGS4	AC006369.1	0.749517	2.35087e-33	postive
ALOX12B	AC006369.1	0.418004	6.4137e-09	postive
ATG4D	AC006369.1	0.461992	8.50955e-11	postive
GABARAPL2	AC006369.1	0.476141	1.8493e-11	postive
ULK2	AC006369.1	0.411158	1.19079e-08	postive
DPP4	AC006369.1	0.691629	1.1626e-26	postive
PEBP1	AC006369.1	0.55425	1.00785e-15	postive
SOCS1	AC006369.1	0.474961	2.10586e-11	postive
CDO1	AC006369.1	0.545596	3.40017e-15	postive
FBXW7	AC006369.1	0.564017	2.44786e-16	postive
LONP1	AC006369.1	0.419962	5.3596e-09	postive
ZNF419	AL353804.1	0.411892	1.11513e-08	postive
SETD1B	AL353804.1	0.477506	1.59008e-11	postive
GABPB1	AL353804.1	0.503569	7.79852e-13	postive
FBXW7	AL353804.1	0.401619	2.7565e-08	postive
GABPB1	AP001412.1	0.412261	1.0788e-08	postive
HRAS	AP001412.1	0.470114	3.57347e-11	postive
PHKG2	AP001412.1	0.416558	7.31776e-09	postive
ULK1	AP001412.1	0.401972	2.67346e-08	postive
ATG4D	AP001412.1	0.441737	6.72465e-10	postive
MAP1LC3A	AP001412.1	0.444493	5.11622e-10	postive
ANO6	AP001412.1	-0.418807	5.95915e-09	negative
SLC1A4	GLIS2-AS1	0.438269	9.45247e-10	postive
ATP6V1G2	GLIS2-AS1	0.507712	4.71514e-13	postive
STMN1	GLIS2-AS1	0.412233	1.0815e-08	postive
MAP1LC3A	GLIS2-AS1	0.458079	1.28228e-10	postive
GABARAPL2	GLIS2-AS1	0.528688	3.31521e-14	postive
DRD4	AC010761.1	0.491129	3.39501e-12	postive
PHKG2	AC010761.1	0.612594	1.01915e-19	postive
TAZ	AC010761.1	0.5623	3.14995e-16	postive
HSF1	AC121757.1	0.41676	7.18456e-09	postive
TF	AC121757.1	0.526969	4.14937e-14	postive
NF2	AC008736.1	0.514527	2.03015e-13	postive
HIC1	AC008736.1	0.444326	5.20167e-10	postive
STMN1	AC008736.1	0.404008	2.2395e-08	postive
WIPI2	AC008736.1	0.496327	1.84955e-12	postive
EGLN2	AC008736.1	0.414807	8.57747e-09	postive
CISD1	AC021321.1	0.460147	1.03309e-10	postive
SLC1A4	AC021321.1	0.424911	3.38705e-09	postive
ZNF419	AC021321.1	0.462204	8.32174e-11	postive
ATP6V1G2	AC021321.1	0.425631	3.16647e-09	postive
SETD1B	AC021321.1	0.403238	2.39485e-08	postive
GABPB1	AC021321.1	0.556005	7.8426e-16	postive
HRAS	AC021321.1	0.40354	2.33281e-08	postive
MAP1LC3A	AC021321.1	0.45408	1.93919e-10	postive
GABARAPL2	AC021321.1	0.617859	4.0391e-20	postive
ATG13	AC021321.1	0.452971	2.17286e-10	postive
PEBP1	AC021321.1	0.478148	1.48077e-11	postive
PANX1	AC004846.1	0.471032	3.2349e-11	postive
ZNF419	AC127502.2	0.412748	1.03264e-08	postive
TUBE1	AC127502.2	0.401439	2.79981e-08	postive
PHKG2	AC127502.2	0.433425	1.51126e-09	postive
NOX4	LINC01096	0.60429	4.23907e-19	postive
ISCU	AC124045.1	0.561356	3.61576e-16	postive
NF2	AC124045.1	0.418756	5.98698e-09	postive
ZNF419	AC124045.1	0.454221	1.9113e-10	postive
ATP6V1G2	AC124045.1	0.420117	5.28367e-09	postive
SETD1B	AC124045.1	0.405685	1.93363e-08	postive
ALOX12B	AC124045.1	0.408452	1.51504e-08	postive
ULK1	AC124045.1	0.504896	6.64302e-13	postive
MAP1LC3A	AC124045.1	0.480346	1.15896e-11	postive
ULK2	AC124045.1	0.426699	2.86441e-09	postive
PEBP1	AC124045.1	0.471529	3.06479e-11	postive
CDO1	AC124045.1	0.425356	3.24908e-09	postive
EPAS1	AC124045.1	0.407667	1.62399e-08	postive
LONP1	AC124045.1	0.485268	6.65241e-12	postive
ZNF419	JPX	0.483951	7.72383e-12	postive
GABPB1	JPX	0.440911	7.29471e-10	postive
SCP2	LINC01184	0.4774	1.6089e-11	postive
MAP1LC3A	AC024560.3	0.414369	8.92384e-09	postive
SCP2	AP001318.2	0.459884	1.06202e-10	postive
PRKAA1	AP001318.2	0.442451	6.26632e-10	postive
PLIN4	MBNL1-AS1	0.481901	9.73422e-12	postive
ZEB1	MBNL1-AS1	0.444492	5.11633e-10	postive
GCH1	LINC01315	0.502589	8.77593e-13	postive
MT3	LINC01315	0.565871	1.86107e-16	postive
SLC1A4	LINC01315	0.617308	4.45335e-20	postive
VLDLR	LINC01315	0.411317	1.174e-08	postive
ATP6V1G2	LINC01315	0.591207	3.68677e-18	postive
SLC2A8	LINC01315	0.483072	8.53085e-12	postive
STMN1	LINC01315	0.527161	4.04722e-14	postive
YWHAE	LINC01315	0.418631	6.05598e-09	postive
MAP1LC3A	LINC01315	0.52563	4.93808e-14	postive
GABARAPL2	LINC01315	0.506627	5.38297e-13	postive
PEBP1	LINC01315	0.444755	4.98401e-10	postive
CISD1	AL121601.1	0.526247	4.55809e-14	postive
FADS2	AL121601.1	0.401272	2.84066e-08	postive
ISCU	AL121601.1	0.466899	5.05182e-11	postive
SLC1A4	AL121601.1	0.486805	5.58312e-12	postive
ATP6V1G2	AL121601.1	0.544134	4.1607e-15	postive
YWHAE	AL121601.1	0.42281	4.11943e-09	postive
GABPB1	AL121601.1	0.544323	4.05412e-15	postive
MAP1LC3A	AL121601.1	0.649075	1.14549e-22	postive
GABARAPL2	AL121601.1	0.61277	9.88391e-20	postive
PEBP1	AL121601.1	0.639694	7.16789e-22	postive
GCH1	AC007319.1	0.518772	1.18972e-13	postive
ATP6V1G2	AC007319.1	0.414492	8.82505e-09	postive
MTOR	AL450326.1	0.481023	1.07428e-11	postive
ZFP69B	AL450326.1	0.45325	2.11171e-10	postive
EIF2AK4	AL450326.1	0.414765	8.61009e-09	postive
IREB2	AL450326.1	0.452227	2.34471e-10	postive
PIK3CA	AL450326.1	0.409541	1.37543e-08	postive
NCOA4	AL450326.1	0.510692	3.26954e-13	postive
ULK2	AL450326.1	0.46161	8.85972e-11	postive
MAPK1	AL450326.1	0.437823	9.87268e-10	postive
ZEB1	AL450326.1	0.451912	2.42137e-10	postive
EPAS1	AL450326.1	0.423665	3.80468e-09	postive
ATM	AL450326.1	0.420673	5.01992e-09	postive
SIRT1	AL450326.1	0.495093	2.13831e-12	postive
NFS1	AC004882.1	0.459734	1.0788e-10	postive
ENPP2	AC004882.1	0.401641	2.7512e-08	postive
MT3	AC004882.1	0.906562	7.74243e-68	postive
BNIP3	AC004882.1	0.736512	1.0666e-31	postive
VLDLR	AC004882.1	0.762477	4.12649e-35	postive
VEGFA	AC004882.1	0.637056	1.18688e-21	postive
RGS4	AC004882.1	0.775958	4.63674e-37	postive
SLC2A8	AC004882.1	0.417546	6.68754e-09	postive
ALOX12B	AC004882.1	0.487756	5.00758e-12	postive
ATG4D	AC004882.1	0.585334	9.43406e-18	postive
SOCS1	AC004882.1	0.808751	1.99326e-42	postive
CDO1	AC004882.1	0.690069	1.67482e-26	postive
FBXW7	AC004882.1	0.596566	1.53828e-18	postive
LONP1	AC004882.1	0.511948	2.79899e-13	postive
SLC3A2	AC079949.1	0.493413	2.60309e-12	postive
FADS2	AC079949.1	0.426183	3.00646e-09	postive
ENPP2	AC079949.1	0.652194	6.13745e-23	postive
SESN2	AC079949.1	0.511045	3.12983e-13	postive
GCH1	AC079949.1	0.692675	9.0897e-27	postive
SRXN1	AC079949.1	0.41182	1.12227e-08	postive
VLDLR	AC079949.1	0.438155	9.55749e-10	postive
RGS4	AC079949.1	0.458937	1.17256e-10	postive
DPP4	AC079949.1	0.721554	6.55079e-30	postive
PEBP1	AC079949.1	0.419497	5.59368e-09	postive
DRD4	U47924.1	0.474809	2.14147e-11	postive
PHKG2	U47924.1	0.592525	2.97817e-18	postive
MAPK1	U47924.1	-0.407935	1.58594e-08	negative
ZEB1	U47924.1	-0.431074	1.89268e-09	negative
TAZ	U47924.1	0.495495	2.03958e-12	postive
NFS1	REPIN1-AS1	0.506644	5.37157e-13	postive
ASNS	REPIN1-AS1	0.516208	1.64442e-13	postive
TUBE1	REPIN1-AS1	0.516662	1.55314e-13	postive
SETD1B	REPIN1-AS1	0.531231	2.37271e-14	postive
GABPB1	REPIN1-AS1	0.442189	6.43061e-10	postive
ATG4D	REPIN1-AS1	0.450347	2.83941e-10	postive
CDO1	REPIN1-AS1	0.428791	2.35134e-09	postive
FBXW7	REPIN1-AS1	0.504385	7.06646e-13	postive
GPX4	AC008764.6	0.403184	2.40632e-08	postive
NFS1	AC008764.6	0.444589	5.06742e-10	postive
MT3	AC008764.6	0.435182	1.27577e-09	postive
ZNF419	AC008764.6	0.442609	6.16876e-10	postive
SLC2A8	AC008764.6	0.431576	1.80413e-09	postive
ALOX12	AC008764.6	0.429273	2.24638e-09	postive
ALOX12B	AC008764.6	0.490297	3.7379e-12	postive
PHKG2	AC008764.6	0.536545	1.16885e-14	postive
ULK1	AC008764.6	0.56515	2.07076e-16	postive
ATG4D	AC008764.6	0.548373	2.31023e-15	postive
SOCS1	AC008764.6	0.410344	1.28056e-08	postive
CDO1	AC008764.6	0.416169	7.58112e-09	postive
ANO6	AC008764.6	-0.417657	6.62042e-09	negative
TAZ	AC008764.6	0.479698	1.24599e-11	postive
FBXW7	AC008764.6	0.431327	1.84751e-09	postive
LONP1	AC008764.6	0.499572	1.25919e-12	postive
HSPA5	PARD6G-AS1	0.440178	7.84053e-10	postive
PTGS2	PARD6G-AS1	0.547154	2.73861e-15	postive
UBC	PARD6G-AS1	0.411728	1.13157e-08	postive
HILPDA	PARD6G-AS1	0.558968	5.11663e-16	postive
NOX4	BX322234.1	0.521734	8.1568e-14	postive
SOCS1	HOXD-AS2	0.415968	7.72044e-09	postive
ALOX12B	AC005790.1	0.499217	1.31362e-12	postive
ULK2	AC005790.1	0.432484	1.6541e-09	postive
PEBP1	AC005790.1	0.415568	8.00615e-09	postive
OXSR1	AC092757.2	0.400666	2.99325e-08	postive
DUSP1	AL133467.1	0.424857	3.4042e-09	postive
TSC22D3	AL133467.1	0.535898	1.27501e-14	postive
IL6	AL133467.1	0.413562	9.59777e-09	postive
IL33	AL133467.1	0.437082	1.06114e-09	postive
CYBB	AL133467.1	0.462172	8.34967e-11	postive
TNFAIP3	AL133467.1	0.504313	7.12897e-13	postive
ATM	AL133467.1	0.636757	1.25628e-21	postive
GPX4	AL158063.1	0.41256	1.05026e-08	postive
NFS1	AL158063.1	0.474931	2.113e-11	postive
MT3	AL158063.1	0.531868	2.18116e-14	postive
BNIP3	AL158063.1	0.476471	1.78298e-11	postive
VLDLR	AL158063.1	0.468484	4.26126e-11	postive
ZNF419	AL158063.1	0.434677	1.33952e-09	postive
RGS4	AL158063.1	0.485837	6.23488e-12	postive
SLC2A8	AL158063.1	0.443236	5.79702e-10	postive
NRAS	AL158063.1	-0.410236	1.2929e-08	negative
ALOX12B	AL158063.1	0.454915	1.77946e-10	postive
PHKG2	AL158063.1	0.439915	8.04519e-10	postive
ULK1	AL158063.1	0.516988	1.49064e-13	postive
ATG4D	AL158063.1	0.504687	6.81291e-13	postive
MAP1LC3A	AL158063.1	0.450669	2.74808e-10	postive
GABARAPL2	AL158063.1	0.427655	2.61772e-09	postive
WIPI2	AL158063.1	0.449574	3.07086e-10	postive
CDO1	AL158063.1	0.546548	2.97936e-15	postive
ANO6	AL158063.1	-0.449098	3.22265e-10	negative
TAZ	AL158063.1	0.401221	2.85311e-08	postive
FBXW7	AL158063.1	0.49195	3.08653e-12	postive
LONP1	AL158063.1	0.546398	3.04219e-15	postive
CISD1	AC060780.1	0.486652	5.68178e-12	postive
NFS1	AC060780.1	0.418923	5.89624e-09	postive
SLC1A4	AC060780.1	0.515808	1.72911e-13	postive
ZNF419	AC060780.1	0.404665	2.1145e-08	postive
ATP6V1G2	AC060780.1	0.400522	3.0308e-08	postive
SETD1B	AC060780.1	0.531518	2.28446e-14	postive
YWHAE	AC060780.1	0.408543	1.50288e-08	postive
GABPB1	AC060780.1	0.529131	3.12802e-14	postive
ALOX12B	AC060780.1	0.496691	1.77182e-12	postive
ATG4D	AC060780.1	0.401473	2.79148e-08	postive
MAP1LC3A	AC060780.1	0.405203	2.01712e-08	postive
GABARAPL2	AC060780.1	0.579169	2.47897e-17	postive
DPP4	AC060780.1	0.427763	2.59119e-09	postive
PEBP1	AC060780.1	0.53352	1.7518e-14	postive
AKR1C1	AL161669.3	0.47737	1.61426e-11	postive
SLC3A2	EXOC3-AS1	0.432201	1.69948e-09	postive
CISD1	EXOC3-AS1	0.417308	6.83445e-09	postive
FADS2	EXOC3-AS1	0.532829	1.9202e-14	postive
NFS1	EXOC3-AS1	0.462191	8.33346e-11	postive
ENPP2	EXOC3-AS1	0.520123	1.00201e-13	postive
ISCU	EXOC3-AS1	0.548735	2.19624e-15	postive
SESN2	EXOC3-AS1	0.469412	3.85521e-11	postive
GCH1	EXOC3-AS1	0.712311	7.31249e-29	postive
BNIP3	EXOC3-AS1	0.420695	5.00976e-09	postive
SLC1A4	EXOC3-AS1	0.574678	4.94736e-17	postive
VLDLR	EXOC3-AS1	0.498294	1.46573e-12	postive
ZNF419	EXOC3-AS1	0.420781	4.97018e-09	postive
ATP6V1G2	EXOC3-AS1	0.674852	5.24259e-25	postive
RGS4	EXOC3-AS1	0.492251	2.98027e-12	postive
SLC2A8	EXOC3-AS1	0.48974	3.98631e-12	postive
SP1	EXOC3-AS1	-0.423137	3.996e-09	negative
YWHAE	EXOC3-AS1	0.450822	2.70572e-10	postive
ALOX12B	EXOC3-AS1	0.446731	4.09013e-10	postive
ULK1	EXOC3-AS1	0.550411	1.73597e-15	postive
ATG4D	EXOC3-AS1	0.466711	5.15444e-11	postive
MAP1LC3A	EXOC3-AS1	0.64421	2.9887e-22	postive
GABARAPL2	EXOC3-AS1	0.584977	9.98291e-18	postive
WIPI2	EXOC3-AS1	0.499075	1.33597e-12	postive
ULK2	EXOC3-AS1	0.45123	2.59562e-10	postive
DPP4	EXOC3-AS1	0.419621	5.53044e-09	postive
PEBP1	EXOC3-AS1	0.704404	5.34711e-28	postive
CDO1	EXOC3-AS1	0.521583	8.31603e-14	postive
ANO6	EXOC3-AS1	-0.468952	4.05153e-11	negative
BACH1	EXOC3-AS1	-0.420492	5.10459e-09	negative
LONP1	EXOC3-AS1	0.561737	3.41997e-16	postive
GCH1	AC091965.4	0.561922	3.32878e-16	postive
MT3	AC091965.4	0.453728	2.01062e-10	postive
SLC1A4	AC091965.4	0.659047	1.51767e-23	postive
ATP6V1G2	AC091965.4	0.686668	3.6828e-26	postive
STMN1	AC091965.4	0.541816	5.71982e-15	postive
YWHAE	AC091965.4	0.459027	1.16155e-10	postive
MAP1LC3A	AC091965.4	0.571086	8.53366e-17	postive
GABARAPL2	AC091965.4	0.590111	4.39994e-18	postive
PEBP1	AC091965.4	0.560294	4.22119e-16	postive
GPT2	RASAL2-AS1	-0.416737	7.19974e-09	negative
MAFG	RASAL2-AS1	0.453062	2.15272e-10	postive
PIK3CA	RASAL2-AS1	0.451918	2.41988e-10	postive
PANX1	RASAL2-AS1	0.471457	3.08918e-11	postive
DNAJB6	RASAL2-AS1	0.401471	2.792e-08	postive
UBC	AP001033.2	0.468981	4.03874e-11	postive
OXSR1	AP001033.2	0.414682	8.67526e-09	postive
DDIT3	AP001033.2	0.493495	2.57828e-12	postive
VEGFA	AP001033.2	0.439941	8.0248e-10	postive
RELA	AP001033.2	0.437609	1.00805e-09	postive
SLC2A1	AP001033.2	0.420825	4.95025e-09	postive
ATG16L1	AP001033.2	0.411961	1.10825e-08	postive
HILPDA	AP001033.2	0.454689	1.82139e-10	postive
KEAP1	AC084809.1	0.427602	2.63089e-09	postive
GABARAPL2	AC084809.1	0.448608	3.38598e-10	postive
SLC3A2	ZNF22-AS1	0.455322	1.70636e-10	postive
GCH1	ZNF22-AS1	0.524084	6.0309e-14	postive
DPP4	ZNF22-AS1	0.592454	3.0127e-18	postive
OTUB1	AC020661.1	0.412204	1.08437e-08	postive
HRAS	AC020661.1	0.479874	1.22174e-11	postive
PHKG2	AC020661.1	0.412611	1.04545e-08	postive
MAP1LC3A	AC020661.1	0.428422	2.43481e-09	postive
SRC	AC016737.1	0.460536	9.91846e-11	postive
OTUB1	AC016737.1	0.438189	9.5263e-10	postive
RELA	AC016737.1	0.419513	5.58533e-09	postive
DRD4	AC016737.1	0.508409	4.3294e-13	postive
PHKG2	AC016737.1	0.654424	3.91088e-23	postive
TAZ	AC016737.1	0.529045	3.16373e-14	postive
ASNS	AL357033.4	0.436147	1.16196e-09	postive
SLC1A5	AL357033.4	0.431186	1.87252e-09	postive
MAPK3	AL357033.4	0.434247	1.39629e-09	postive
CISD1	PANK2-AS1	0.40817	1.55329e-08	postive
GABPB1	PANK2-AS1	0.568183	1.31937e-16	postive
GABARAPL2	PANK2-AS1	0.484317	7.40997e-12	postive
ENPP2	AC027307.3	0.469942	3.64072e-11	postive
ALOX12B	AC027307.3	0.506519	5.45447e-13	postive
ALOXE3	AC027307.3	0.624336	1.26263e-20	postive
ULK1	AC027307.3	0.466229	5.42754e-11	postive
LONP1	AC027307.3	0.492658	2.84237e-12	postive
GPX4	COA6-AS1	0.457478	1.36503e-10	postive
CISD1	COA6-AS1	0.583925	1.1785e-17	postive
OTUB1	COA6-AS1	0.407132	1.70253e-08	postive
SLC1A4	COA6-AS1	0.424692	3.45722e-09	postive
ATP6V1G2	COA6-AS1	0.456594	1.49609e-10	postive
YWHAE	COA6-AS1	0.401674	2.7435e-08	postive
GABPB1	COA6-AS1	0.542477	5.22508e-15	postive
HRAS	COA6-AS1	0.535853	1.28268e-14	postive
PHKG2	COA6-AS1	0.464603	6.45451e-11	postive
MAP1LC3A	COA6-AS1	0.663482	6.02593e-24	postive
GABARAPL2	COA6-AS1	0.623372	1.50365e-20	postive
WIPI2	COA6-AS1	0.401909	2.68804e-08	postive
PEBP1	COA6-AS1	0.5006	1.11392e-12	postive
ANO6	COA6-AS1	-0.500182	1.17094e-12	negative
BACH1	COA6-AS1	-0.40708	1.71024e-08	negative
TUBE1	AC105206.2	0.402061	2.65281e-08	postive
MAFG	AC105206.2	0.428084	2.51385e-09	postive
GABARAPL1	AC105206.2	0.426988	2.78758e-09	postive
NFS1	AC018648.1	0.446246	4.29424e-10	postive
MT3	AC018648.1	0.420214	5.23683e-09	postive
VLDLR	AC018648.1	0.449271	3.16651e-10	postive
ZNF419	AC018648.1	0.543226	4.71473e-15	postive
TUBE1	AC018648.1	0.411425	1.16274e-08	postive
RGS4	AC018648.1	0.439646	8.26103e-10	postive
HRAS	AC018648.1	0.427378	2.68688e-09	postive
PHKG2	AC018648.1	0.4935	2.57679e-12	postive
ULK1	AC018648.1	0.542241	5.39676e-15	postive
ATG4D	AC018648.1	0.504048	7.36087e-13	postive
MAP1LC3A	AC018648.1	0.479695	1.2463e-11	postive
GABARAPL2	AC018648.1	0.437005	1.06911e-09	postive
WIPI2	AC018648.1	0.434454	1.3687e-09	postive
PEBP1	AC018648.1	0.501993	9.42749e-13	postive
ANO6	AC018648.1	-0.432586	1.63788e-09	negative
TAZ	AC018648.1	0.40121	2.85582e-08	postive
FBXW7	AC018648.1	0.432478	1.65497e-09	postive
LONP1	AC018648.1	0.52291	7.01557e-14	postive
ZNF419	AC010463.3	0.464705	6.3848e-11	postive
PHKG2	AC010463.3	0.495241	2.10154e-12	postive
ULK1	AC010463.3	0.448236	3.51563e-10	postive
ATG4D	AC010463.3	0.430705	1.96049e-09	postive
TAZ	AC010463.3	0.445498	4.62787e-10	postive
TSC22D3	LINC01215	0.447607	3.7456e-10	postive
IL6	LINC01215	0.406552	1.79179e-08	postive
GABPB1	LINC01215	0.429494	2.19969e-09	postive
TNFAIP3	LINC01215	0.500059	1.18828e-12	postive
ATM	LINC01215	0.706893	2.87909e-28	postive
HSF1	LASTR	0.448489	3.42696e-10	postive
BID	LASTR	0.407037	1.71677e-08	postive
GPX4	AC103706.1	0.580001	2.17827e-17	postive
OTUB1	AC103706.1	0.478966	1.35191e-11	postive
PRDX6	AC103706.1	0.563861	2.5045e-16	postive
AIFM2	AC103706.1	0.473592	2.44709e-11	postive
RPL8	AC103706.1	0.625423	1.036e-20	postive
HAMP	AC103706.1	0.588436	5.75686e-18	postive
PHKG2	AC103706.1	0.529794	2.86744e-14	postive
MAPK1	AC103706.1	-0.419698	5.49129e-09	negative
EGLN2	AC103706.1	0.497286	1.65146e-12	postive
CISD1	AL122008.3	0.60536	3.53606e-19	postive
FADS2	AL122008.3	0.58066	1.96602e-17	postive
ENPP2	AL122008.3	0.42986	2.12455e-09	postive
ISCU	AL122008.3	0.427474	2.66269e-09	postive
GCH1	AL122008.3	0.643719	3.28903e-22	postive
SLC1A4	AL122008.3	0.780325	1.01243e-37	postive
VLDLR	AL122008.3	0.435568	1.22902e-09	postive
ATP6V1G2	AL122008.3	0.68806	2.67087e-26	postive
STMN1	AL122008.3	0.498917	1.36126e-12	postive
YWHAE	AL122008.3	0.532434	2.02352e-14	postive
GABPB1	AL122008.3	0.426342	2.96212e-09	postive
GOT1	AL122008.3	0.427278	2.71241e-09	postive
MAP1LC3A	AL122008.3	0.532413	2.02915e-14	postive
GABARAPL2	AL122008.3	0.733924	2.21821e-31	postive
ATG13	AL122008.3	0.497662	1.57974e-12	postive
DPP4	AL122008.3	0.555736	8.1508e-16	postive
PEBP1	AL122008.3	0.691544	1.18593e-26	postive
SLC7A11	AC025575.2	0.439487	8.39015e-10	postive
SLC1A5	AC025575.2	0.451251	2.58992e-10	postive
GPX4	ZFAS1	0.50206	9.35208e-13	postive
HSF1	ZFAS1	0.523837	6.22612e-14	postive
VDAC2	ZFAS1	0.400073	3.15043e-08	postive
OTUB1	ZFAS1	0.464507	6.52098e-11	postive
PRDX6	ZFAS1	0.421949	4.46156e-09	postive
RPL8	ZFAS1	0.547168	2.73334e-15	postive
HRAS	ZFAS1	0.464423	6.579e-11	postive
CARS1	ZFAS1	0.441173	7.1089e-10	postive
ISCU	AC135507.1	0.592481	2.99953e-18	postive
ATP6V1G2	AC135507.1	0.438983	8.81525e-10	postive
GABPB1	AC135507.1	0.422497	4.24064e-09	postive
MAP1LC3A	AC135507.1	0.427946	2.54685e-09	postive
PEBP1	AC135507.1	0.4626	7.98132e-11	postive
SOCS1	AC135507.1	0.417416	6.76774e-09	postive
CDO1	AC135507.1	0.400376	3.06923e-08	postive
FBXW7	AC135507.1	0.46023	1.0242e-10	postive
MT1G	AC087482.1	0.747607	4.17702e-33	postive
ALB	AC087482.1	0.526247	4.55827e-14	postive
GPT2	AC087482.1	0.565585	1.94181e-16	postive
HMGB1	AC087482.1	-0.433427	1.5109e-09	negative
ELAVL1	AC087482.1	-0.52906	3.15727e-14	negative
FLT3	AC087482.1	0.403757	2.28899e-08	postive
DNAJB6	AC087482.1	-0.422313	4.31383e-09	negative
NQO1	AC023794.5	0.454401	1.87621e-10	postive
MUC1	AC023794.5	0.473631	2.43666e-11	postive
SRC	AC023794.5	0.485491	6.48529e-12	postive
PML	AC023794.5	0.40118	2.8633e-08	postive
GPX2	AC023794.5	0.474308	2.26246e-11	postive
ALOX5	AC023794.5	0.430366	2.02484e-09	postive
PHKG2	AC023794.5	0.440259	7.77847e-10	postive
ATG16L1	AC023794.5	0.433793	1.45867e-09	postive
MAPK3	AC023794.5	0.442581	6.18608e-10	postive
ACVR1B	AC023794.5	0.408763	1.4738e-08	postive
LPIN1	AC023794.5	0.421582	4.61564e-09	postive
SLC7A11	AC091544.4	0.421959	4.45765e-09	postive
WIPI1	AC091544.4	0.550468	1.72209e-15	postive
NQO1	ELF3-AS1	0.602371	5.85805e-19	postive
MUC1	ELF3-AS1	0.557149	6.6539e-16	postive
SRC	ELF3-AS1	0.501709	9.75401e-13	postive
FH	ELF3-AS1	0.526634	4.33445e-14	postive
OTUB1	ELF3-AS1	0.429344	2.23123e-09	postive
PRDX6	ELF3-AS1	0.457642	1.34191e-10	postive
AIFM2	ELF3-AS1	0.476616	1.7547e-11	postive
GPX2	ELF3-AS1	0.556041	7.80186e-16	postive
GDF15	ELF3-AS1	0.411009	1.20681e-08	postive
RELA	ELF3-AS1	0.42815	2.49813e-09	postive
RPL8	ELF3-AS1	0.402834	2.48062e-08	postive
CAPG	ELF3-AS1	0.43182	1.76249e-09	postive
HNF4A	ELF3-AS1	0.407225	1.68853e-08	postive
NOX1	ELF3-AS1	0.412852	1.02303e-08	postive
PHKG2	ELF3-AS1	0.483372	8.24647e-12	postive
ULK2	ELF3-AS1	-0.45696	1.44041e-10	negative
MAPK3	ELF3-AS1	0.533346	1.79269e-14	postive
NQO1	AL138767.3	-0.418671	6.03425e-09	negative
FADS2	AL138767.3	0.562059	3.2629e-16	postive
ENPP2	AL138767.3	0.435842	1.19685e-09	postive
ISCU	AL138767.3	0.489629	4.03778e-12	postive
SESN2	AL138767.3	0.446536	4.17111e-10	postive
GCH1	AL138767.3	0.716287	2.6209e-29	postive
SLC1A4	AL138767.3	0.519186	1.12886e-13	postive
VLDLR	AL138767.3	0.447034	3.96782e-10	postive
ATP6V1G2	AL138767.3	0.704812	4.83325e-28	postive
RGS4	AL138767.3	0.428614	2.39087e-09	postive
YWHAE	AL138767.3	0.437025	1.067e-09	postive
MAP1LC3A	AL138767.3	0.47396	2.35063e-11	postive
GABARAPL2	AL138767.3	0.55285	1.22991e-15	postive
ULK2	AL138767.3	0.492061	3.04695e-12	postive
PEBP1	AL138767.3	0.583271	1.30641e-17	postive
CDO1	AL138767.3	0.425806	3.11476e-09	postive
HSF1	TONSL-AS1	0.468334	4.33042e-11	postive
TP63	LINC02541	0.578635	2.69254e-17	postive
HSF1	AL122125.1	0.40417	2.20791e-08	postive
DDIT4	AL122125.1	0.43876	9.00915e-10	postive
DRD4	AL122125.1	0.488318	4.69504e-12	postive
ACSF2	AL122125.1	0.436243	1.15125e-09	postive
PHKG2	AL122125.1	0.496291	1.85735e-12	postive
TAZ	AL122125.1	0.442937	5.97158e-10	postive
FANCD2	AC008870.2	0.429846	2.12736e-09	postive
HELLS	AC008870.2	0.460634	9.81697e-11	postive
RELA	AC008870.2	0.413346	9.78591e-09	postive
DRD4	AC008870.2	0.550491	1.71651e-15	postive
PHKG2	AC008870.2	0.69114	1.30388e-26	postive
TAZ	AC008870.2	0.623753	1.40332e-20	postive
DRD4	AC019186.1	0.43181	1.76415e-09	postive
PHKG2	AC019186.1	0.440437	7.64322e-10	postive
ATG16L1	AC019186.1	0.436734	1.09763e-09	postive
TAZ	AC019186.1	0.400694	2.98609e-08	postive
CD44	EGOT	0.411945	1.10983e-08	postive
LINC00472	EGOT	0.476025	1.873e-11	postive
MT1G	LINC01251	0.403226	2.39739e-08	postive
ALB	LINC01251	0.528157	3.55359e-14	postive
GPT2	LINC01251	0.55149	1.49092e-15	postive
PSAT1	LINC01251	0.437365	1.03231e-09	postive
ELAVL1	LINC01251	-0.446953	4.00005e-10	negative
MUC1	AC011676.1	0.41557	8.00498e-09	postive
DDIT3	AC011676.1	0.435564	1.22946e-09	postive
GPX4	SNHG6	0.620091	2.71348e-20	postive
CISD1	SNHG6	0.450416	2.8197e-10	postive
OTUB1	SNHG6	0.402176	2.62661e-08	postive
PRDX6	SNHG6	0.403677	2.30502e-08	postive
RPL8	SNHG6	0.68698	3.42697e-26	postive
HRAS	SNHG6	0.507884	4.61675e-13	postive
ANO6	SNHG6	-0.409157	1.42318e-08	negative
GPX4	AL390198.1	0.488801	4.44151e-12	postive
FH	AL390198.1	0.412825	1.02559e-08	postive
PRDX6	AL390198.1	0.433448	1.50783e-09	postive
RPL8	AL390198.1	0.603529	4.82016e-19	postive
HAMP	AL390198.1	0.624628	1.1974e-20	postive
MUC1	AC083843.2	0.419157	5.77129e-09	postive
HELLS	AC083843.2	0.433035	1.56884e-09	postive
SRC	AC083843.2	0.421495	4.65291e-09	postive
RELA	AC083843.2	0.441582	6.82796e-10	postive
SP1	AC083843.2	0.490607	3.60633e-12	postive
ATG16L1	AC083843.2	0.521873	8.0129e-14	postive
ACVR1B	AC083843.2	0.45017	2.89092e-10	postive
LPIN1	AC083843.2	0.411101	1.19683e-08	postive
MUC1	TM4SF1-AS1	0.412334	1.07177e-08	postive
PROM2	TM4SF1-AS1	0.457464	1.36691e-10	postive
PTGS2	TM4SF1-AS1	0.48319	8.41768e-12	postive
SLC2A1	TM4SF1-AS1	0.436507	1.12207e-09	postive
HILPDA	TM4SF1-AS1	0.440799	7.37608e-10	postive
ENPP2	AC124312.2	0.486385	5.8572e-12	postive
GCH1	AC124312.2	0.486603	5.71327e-12	postive
TUBE1	AC124312.2	0.460336	1.01292e-10	postive
SETD1B	AC124312.2	0.457755	1.32626e-10	postive
ULK2	AC124312.2	0.4428	6.05335e-10	postive
DPP4	AC124312.2	0.426553	2.90389e-09	postive
PEBP1	AC124312.2	0.440039	7.94836e-10	postive
EPAS1	AC124312.2	0.433489	1.502e-09	postive
ATM	AC124312.2	0.405255	2.00805e-08	postive
SIRT1	AC124312.2	0.414591	8.74646e-09	postive
NOX4	AC011352.1	0.514128	2.13385e-13	postive
NCF2	LINC01150	0.593239	2.65155e-18	postive
IL33	LINC01150	0.437261	1.04282e-09	postive
CYBB	LINC01150	0.596122	1.65486e-18	postive
FLT3	LINC01150	0.52037	9.71027e-14	postive
NCOA4	LINC01150	0.428119	2.5056e-09	postive
ZEB1	LINC01150	0.496924	1.7237e-12	postive
TLR4	LINC01150	0.579087	2.5106e-17	postive
SIRT1	LINC01150	0.435037	1.29384e-09	postive
CISD1	AC002470.1	0.454696	1.8202e-10	postive
FADS2	AC002470.1	0.489137	4.27299e-12	postive
ISCU	AC002470.1	0.419004	5.85238e-09	postive
GCH1	AC002470.1	0.675635	4.41368e-25	postive
MT3	AC002470.1	0.411796	1.12475e-08	postive
SLC1A4	AC002470.1	0.652531	5.73474e-23	postive
ATP6V1G2	AC002470.1	0.735202	1.54676e-31	postive
SLC2A8	AC002470.1	0.511456	2.97471e-13	postive
STMN1	AC002470.1	0.544689	3.85403e-15	postive
YWHAE	AC002470.1	0.546648	2.93817e-15	postive
HRAS	AC002470.1	0.451571	2.50693e-10	postive
ULK1	AC002470.1	0.400095	3.14449e-08	postive
MAP1LC3A	AC002470.1	0.707467	2.49396e-28	postive
GABARAPL2	AC002470.1	0.635517	1.58921e-21	postive
WIPI2	AC002470.1	0.529389	3.0239e-14	postive
PEBP1	AC002470.1	0.624115	1.31426e-20	postive
ANO6	AC002470.1	-0.416491	7.36251e-09	negative
LONP1	AC002470.1	0.460757	9.69102e-11	postive
GPX4	AC106820.3	0.447103	3.9402e-10	postive
CISD1	AC106820.3	0.432479	1.6548e-09	postive
NFS1	AC106820.3	0.411655	1.13902e-08	postive
GCH1	AC106820.3	0.444528	5.09799e-10	postive
MT3	AC106820.3	0.484316	7.41158e-12	postive
SLC1A4	AC106820.3	0.598429	1.13078e-18	postive
ZNF419	AC106820.3	0.408046	1.57036e-08	postive
ATP6V1G2	AC106820.3	0.53059	2.582e-14	postive
SLC2A8	AC106820.3	0.503601	7.76871e-13	postive
STMN1	AC106820.3	0.53753	1.02372e-14	postive
HRAS	AC106820.3	0.582362	1.50686e-17	postive
ULK1	AC106820.3	0.412163	1.08831e-08	postive
ATG4D	AC106820.3	0.441987	6.56059e-10	postive
MAP1LC3A	AC106820.3	0.633255	2.43355e-21	postive
GABARAPL2	AC106820.3	0.575148	4.6047e-17	postive
WIPI2	AC106820.3	0.515347	1.83213e-13	postive
PEBP1	AC106820.3	0.473379	2.50483e-11	postive
ANO6	AC106820.3	-0.485801	6.26037e-12	negative
LONP1	AC106820.3	0.49078	3.53503e-12	postive
ZFP36	AC010271.1	0.460305	1.0162e-10	postive
DDIT4	AC010271.1	0.40639	1.81744e-08	postive
DRD4	AC010271.1	0.422644	4.18347e-09	postive
ALOX12	AC010271.1	0.451731	2.4665e-10	postive
ATG16L1	AC010271.1	0.439636	8.26866e-10	postive
NQO1	LINC00857	0.419179	5.75954e-09	postive
HELLS	LINC00857	0.426423	2.93955e-09	postive
SRC	LINC00857	0.437213	1.04769e-09	postive
PML	LINC00857	0.458198	1.26646e-10	postive
VDAC2	LINC00857	0.53785	9.80428e-15	postive
AIFM2	LINC00857	0.449707	3.02973e-10	postive
EIF2S1	LINC00857	0.410053	1.31415e-08	postive
RELA	LINC00857	0.474938	2.11119e-11	postive
ATP5MC3	LINC00857	0.453932	1.9688e-10	postive
ATG16L1	LINC00857	0.453202	2.12202e-10	postive
ULK2	LINC00857	-0.403413	2.35867e-08	negative
BID	LINC00857	0.456555	1.50213e-10	postive
IDH1	LINC00857	0.409146	1.4246e-08	postive
NFS1	AC084824.4	0.427369	2.6893e-09	postive
VLDLR	AC084824.4	0.411536	1.15124e-08	postive
ZNF419	AC084824.4	0.56236	3.12203e-16	postive
VEGFA	AC084824.4	0.465429	5.91129e-11	postive
TUBE1	AC084824.4	0.497034	1.70142e-12	postive
RGS4	AC084824.4	0.449018	3.24866e-10	postive
ALOX12	AC084824.4	0.5034	7.95946e-13	postive
ULK1	AC084824.4	0.409269	1.4091e-08	postive
FBXW7	AC084824.4	0.593848	2.40138e-18	postive
LONP1	AC084824.4	0.400838	2.94905e-08	postive
GCH1	CLCA4-AS1	0.447627	3.73813e-10	postive
MT3	CLCA4-AS1	0.449926	2.96341e-10	postive
SLC1A4	CLCA4-AS1	0.50324	8.11412e-13	postive
ATP6V1G2	CLCA4-AS1	0.505671	6.04684e-13	postive
STMN1	CLCA4-AS1	0.630238	4.27289e-21	postive
HRAS	CLCA4-AS1	0.415258	8.23461e-09	postive
MAP1LC3A	CLCA4-AS1	0.499382	1.28805e-12	postive
GABARAPL2	CLCA4-AS1	0.545831	3.2911e-15	postive
HILPDA	AC022784.5	0.411662	1.13826e-08	postive
PRKAA1	AC009093.4	0.405289	2.00208e-08	postive
NFS1	SCOC-AS1	0.526018	4.6954e-14	postive
ENPP2	SCOC-AS1	0.612102	1.11028e-19	postive
ISCU	SCOC-AS1	0.514723	1.9811e-13	postive
GCH1	SCOC-AS1	0.551693	1.44883e-15	postive
MT3	SCOC-AS1	0.603421	4.90909e-19	postive
BNIP3	SCOC-AS1	0.532033	2.1339e-14	postive
SLC1A4	SCOC-AS1	0.4023	2.59834e-08	postive
VLDLR	SCOC-AS1	0.698189	2.44052e-27	postive
ZNF419	SCOC-AS1	0.505057	6.51493e-13	postive
ATP6V1G2	SCOC-AS1	0.545578	3.40841e-15	postive
RGS4	SCOC-AS1	0.74168	2.407e-32	postive
SLC2A8	SCOC-AS1	0.462058	8.45083e-11	postive
ALOX12B	SCOC-AS1	0.420016	5.33315e-09	postive
ULK1	SCOC-AS1	0.561552	3.5138e-16	postive
ATG4D	SCOC-AS1	0.533552	1.74428e-14	postive
MAP1LC3A	SCOC-AS1	0.546435	3.02642e-15	postive
GABARAPL2	SCOC-AS1	0.469941	3.64119e-11	postive
WIPI2	SCOC-AS1	0.415208	8.27171e-09	postive
ULK2	SCOC-AS1	0.401944	2.68001e-08	postive
PEBP1	SCOC-AS1	0.616174	5.44169e-20	postive
SOCS1	SCOC-AS1	0.464773	6.33854e-11	postive
CDO1	SCOC-AS1	0.722494	5.09744e-30	postive
FBXW7	SCOC-AS1	0.416904	7.09092e-09	postive
LONP1	SCOC-AS1	0.601273	7.0421e-19	postive
SLC2A12	AL139246.4	0.557203	6.60172e-16	postive
ALOX12	AL139246.4	0.456372	1.53095e-10	postive
FADS2	AC092574.1	0.420076	5.30399e-09	postive
NFS1	AC092574.1	0.490688	3.57252e-12	postive
ENPP2	AC092574.1	0.547321	2.67556e-15	postive
ISCU	AC092574.1	0.532602	1.97893e-14	postive
GCH1	AC092574.1	0.659291	1.44323e-23	postive
SLC1A4	AC092574.1	0.509332	3.86598e-13	postive
VLDLR	AC092574.1	0.496753	1.75889e-12	postive
ZNF419	AC092574.1	0.459806	1.07073e-10	postive
ATP6V1G2	AC092574.1	0.579811	2.2437e-17	postive
RGS4	AC092574.1	0.46697	5.01373e-11	postive
SETD1B	AC092574.1	0.411905	1.11384e-08	postive
ULK1	AC092574.1	0.549191	2.06051e-15	postive
ATG4D	AC092574.1	0.506959	5.16922e-13	postive
MAP1LC3A	AC092574.1	0.510009	3.55664e-13	postive
GABARAPL2	AC092574.1	0.567284	1.50878e-16	postive
DPP4	AC092574.1	0.467149	4.91824e-11	postive
PEBP1	AC092574.1	0.680061	1.65111e-25	postive
CDO1	AC092574.1	0.429122	2.27867e-09	postive
LONP1	AC092574.1	0.564353	2.32959e-16	postive
OXSR1	LINC01876	0.429492	2.20002e-09	postive
TF	LINC01876	0.547912	2.46383e-15	postive
TFAP2C	LINC01876	0.509876	3.61548e-13	postive
SP1	LINC01876	0.421388	4.69937e-09	postive
KRAS	LINC01876	0.471938	2.93166e-11	postive
ATG16L1	LINC01876	0.468953	4.05096e-11	postive
STMN1	LINC02802	0.493232	2.65846e-12	postive
NFS1	AC009407.1	0.451018	2.6521e-10	postive
MT3	AC009407.1	0.492331	2.95277e-12	postive
VLDLR	AC009407.1	0.448107	3.56163e-10	postive
EIF2S1	AC009407.1	-0.404127	2.21629e-08	negative
SLC2A8	AC009407.1	0.535933	1.26904e-14	postive
NRAS	AC009407.1	-0.419953	5.36436e-09	negative
KEAP1	AC009407.1	0.400968	2.91633e-08	postive
ALOX12B	AC009407.1	0.407355	1.66924e-08	postive
ATG4D	AC009407.1	0.487184	5.34639e-12	postive
MAP1LC3A	AC009407.1	0.412403	1.06516e-08	postive
WIPI2	AC009407.1	0.403773	2.28591e-08	postive
PEBP1	AC009407.1	0.554818	9.29426e-16	postive
CDO1	AC009407.1	0.40359	2.32263e-08	postive
PANX1	AC009407.1	-0.504034	7.37332e-13	negative
BACH1	AC009407.1	-0.403046	2.43522e-08	negative
LONP1	AC009407.1	0.497096	1.68899e-12	postive
FANCD2	AC016394.1	0.405992	1.88227e-08	postive
HELLS	AC016394.1	0.450255	2.86608e-10	postive
OTUB1	AC016394.1	0.425418	3.23028e-09	postive
AIFM2	AC016394.1	0.40679	1.75453e-08	postive
PHKG2	AC016394.1	0.622807	1.66546e-20	postive
TAZ	AC016394.1	0.562493	3.06212e-16	postive
ALOXE3	AL121894.2	0.440011	7.97021e-10	postive
ULK1	AL121894.2	0.44226	6.38576e-10	postive
HMOX1	PDE2A-AS2	0.597205	1.38442e-18	postive
NF2	PDE2A-AS2	0.445843	4.471e-10	postive
TSC22D3	PDE2A-AS2	0.490248	3.75916e-12	postive
IL6	PDE2A-AS2	0.499417	1.28273e-12	postive
IL33	PDE2A-AS2	0.418012	6.4088e-09	postive
HIC1	PDE2A-AS2	0.605255	3.59927e-19	postive
CYBB	PDE2A-AS2	0.5124	2.64632e-13	postive
EPAS1	PDE2A-AS2	0.484568	7.20226e-12	postive
TNFAIP3	PDE2A-AS2	0.494469	2.30048e-12	postive
ATM	PDE2A-AS2	0.544301	4.06648e-15	postive
NFE2L2	AP001372.2	0.415325	8.18447e-09	postive
SCP2	AP001372.2	0.573387	6.02276e-17	postive
SNX4	AP001372.2	0.406776	1.75669e-08	postive
IDH1	AP001372.2	0.458198	1.2665e-10	postive
SLC3A2	AC104985.1	0.417197	6.90373e-09	postive
FADS2	AC104985.1	0.487792	4.98671e-12	postive
ENPP2	AC104985.1	0.807798	2.95076e-42	postive
SESN2	AC104985.1	0.500808	1.08657e-12	postive
GCH1	AC104985.1	0.665918	3.60349e-24	postive
SRXN1	AC104985.1	0.430934	1.91816e-09	postive
SLC1A4	AC104985.1	0.405705	1.93024e-08	postive
VLDLR	AC104985.1	0.51311	2.42272e-13	postive
ATP6V1G2	AC104985.1	0.420795	4.96361e-09	postive
RGS4	AC104985.1	0.482177	9.4363e-12	postive
ULK1	AC104985.1	0.459203	1.14046e-10	postive
GABARAPL2	AC104985.1	0.422148	4.38023e-09	postive
DPP4	AC104985.1	0.665779	3.71148e-24	postive
PEBP1	AC104985.1	0.558126	5.77983e-16	postive
GPX4	AL117332.1	0.4224	4.27923e-09	postive
NF2	AL117332.1	0.51608	1.67097e-13	postive
CHMP6	AL117332.1	0.491802	3.13985e-12	postive
SLC2A8	AL117332.1	0.474292	2.26659e-11	postive
HIC1	AL117332.1	0.550602	1.68998e-15	postive
KRAS	AL117332.1	-0.440071	7.92296e-10	negative
HRAS	AL117332.1	0.46563	5.78546e-11	postive
MAP1LC3A	AL117332.1	0.524211	5.93298e-14	postive
WIPI2	AL117332.1	0.450307	2.851e-10	postive
ZNF419	AC010201.2	0.454742	1.81144e-10	postive
TUBE1	AC010201.2	0.4817	9.95699e-12	postive
SETD1B	AC010201.2	0.513191	2.39829e-13	postive
ALOX12	AC010201.2	0.447128	3.93027e-10	postive
PHKG2	AC010201.2	0.434015	1.42788e-09	postive
ULK1	AC010201.2	0.417563	6.67704e-09	postive
ACVR1B	AC010201.2	0.401181	2.86292e-08	postive
TAZ	AC010201.2	0.40955	1.37427e-08	postive
CISD1	AC005256.1	0.557155	6.6476e-16	postive
GABPB1	AC005256.1	0.524177	5.9595e-14	postive
GABARAPL2	AC005256.1	0.470424	3.45533e-11	postive
PHKG2	AC080013.2	0.408483	1.51082e-08	postive
LINC00472	AC080013.2	0.48151	1.01713e-11	postive
DDIT4	DTX2P1-UPK3BP1-PMS2P11	0.450563	2.77782e-10	postive
DRD4	DTX2P1-UPK3BP1-PMS2P11	0.438958	8.83645e-10	postive
ACSF2	DTX2P1-UPK3BP1-PMS2P11	0.46927	3.91479e-11	postive
PHKG2	DTX2P1-UPK3BP1-PMS2P11	0.547505	2.60801e-15	postive
TAZ	DTX2P1-UPK3BP1-PMS2P11	0.449768	3.01123e-10	postive
NFS1	AC068620.2	0.546047	3.19382e-15	postive
ISCU	AC068620.2	0.416473	7.37456e-09	postive
MT3	AC068620.2	0.441033	7.20762e-10	postive
BNIP3	AC068620.2	0.422572	4.21153e-09	postive
VLDLR	AC068620.2	0.466382	5.33941e-11	postive
ZNF419	AC068620.2	0.571464	8.06072e-17	postive
ATP6V1G2	AC068620.2	0.408114	1.56099e-08	postive
RGS4	AC068620.2	0.472512	2.75364e-11	postive
SLC2A8	AC068620.2	0.496329	1.84891e-12	postive
ALOX12	AC068620.2	0.422296	4.32053e-09	postive
HRAS	AC068620.2	0.409034	1.43877e-08	postive
ALOX12B	AC068620.2	0.567186	1.53104e-16	postive
PHKG2	AC068620.2	0.421166	4.79654e-09	postive
ULK1	AC068620.2	0.641562	5.0006e-22	postive
ATG4D	AC068620.2	0.616518	5.1215e-20	postive
MAP1LC3A	AC068620.2	0.503461	7.90147e-13	postive
GABARAPL2	AC068620.2	0.429679	2.16148e-09	postive
WIPI2	AC068620.2	0.483709	7.93889e-12	postive
PEBP1	AC068620.2	0.487012	5.45252e-12	postive
SOCS1	AC068620.2	0.410887	1.21996e-08	postive
CDO1	AC068620.2	0.56009	4.34791e-16	postive
ANO6	AC068620.2	-0.447566	3.76092e-10	negative
TAZ	AC068620.2	0.403096	2.42462e-08	postive
FBXW7	AC068620.2	0.443428	5.68757e-10	postive
LONP1	AC068620.2	0.623663	1.42653e-20	postive
HSPB1	C5orf66-AS1	0.414223	9.04226e-09	postive
MUC1	C5orf66-AS1	0.409794	1.34483e-08	postive
OTUB1	C5orf66-AS1	0.413123	9.98415e-09	postive
DRD4	C5orf66-AS1	0.434547	1.35646e-09	postive
CAPG	C5orf66-AS1	0.439396	8.46591e-10	postive
PHKG2	C5orf66-AS1	0.459494	1.10621e-10	postive
TAZ	C5orf66-AS1	0.403241	2.39421e-08	postive
SETD1B	ZNRD2-AS1	0.417894	6.47839e-09	postive
ALOX12	ZNRD2-AS1	0.552184	1.35156e-15	postive
GABPB1	ZNRD2-AS1	0.412158	1.08881e-08	postive
PHKG2	ZNRD2-AS1	0.475113	2.07112e-11	postive
TAZ	ZNRD2-AS1	0.412951	1.014e-08	postive
SRC	AC023024.1	0.42924	2.25333e-09	postive
PML	AC023024.1	0.485741	6.3039e-12	postive
PROM2	AC023024.1	0.401945	2.67979e-08	postive
ALOX5	AC023024.1	0.442035	6.52916e-10	postive
SP1	AC023024.1	0.429381	2.2234e-09	postive
ATG16L1	AC023024.1	0.417263	6.86264e-09	postive
PRKAA1	AC023024.1	0.415573	8.00215e-09	postive
SLC3A2	AL161421.1	0.510208	3.47042e-13	postive
NFS1	AL161421.1	0.450312	2.84966e-10	postive
ENPP2	AL161421.1	0.598089	1.19626e-18	postive
SESN2	AL161421.1	0.443875	5.44073e-10	postive
CHMP6	AL161421.1	0.405013	2.05108e-08	postive
GCH1	AL161421.1	0.64187	4.71057e-22	postive
SLC1A4	AL161421.1	0.4191	5.80149e-09	postive
VLDLR	AL161421.1	0.457064	1.42493e-10	postive
RGS4	AL161421.1	0.414846	8.54682e-09	postive
SLC2A8	AL161421.1	0.431716	1.78009e-09	postive
ULK1	AL161421.1	0.471999	2.91198e-11	postive
ATG4D	AL161421.1	0.437559	1.01294e-09	postive
MAP1LC3A	AL161421.1	0.412905	1.01821e-08	postive
GABARAPL2	AL161421.1	0.476183	1.84069e-11	postive
WIPI2	AL161421.1	0.40942	1.39032e-08	postive
DPP4	AL161421.1	0.458321	1.25037e-10	postive
PEBP1	AL161421.1	0.54191	5.64708e-15	postive
LONP1	AL161421.1	0.513751	2.23673e-13	postive
SLC7A11	LINC01079	0.409517	1.37839e-08	postive
ASNS	LINC01079	0.471893	2.94592e-11	postive
CEBPG	LINC01079	0.413467	9.67991e-09	postive
WIPI1	LINC01079	0.54131	6.1298e-15	postive
TSC22D3	AP000763.3	0.459252	1.13454e-10	postive
SLC2A6	AP000763.3	0.400209	3.11377e-08	postive
PLIN4	AP000763.3	0.401096	2.88412e-08	postive
TNFAIP3	AP000763.3	0.508307	4.38386e-13	postive
ATM	AP000763.3	0.529724	2.89366e-14	postive
CISD1	AL022328.4	0.577497	3.20991e-17	postive
FADS2	AL022328.4	0.413425	9.71659e-09	postive
ISCU	AL022328.4	0.472561	2.73895e-11	postive
CHMP6	AL022328.4	0.441634	6.79285e-10	postive
SLC1A4	AL022328.4	0.529028	3.17058e-14	postive
ATP6V1G2	AL022328.4	0.51237	2.65624e-13	postive
SETD1B	AL022328.4	0.430209	2.05527e-09	postive
YWHAE	AL022328.4	0.429332	2.2337e-09	postive
GABPB1	AL022328.4	0.618978	3.30993e-20	postive
HRAS	AL022328.4	0.41846	6.1519e-09	postive
MAP1LC3A	AL022328.4	0.623211	1.54817e-20	postive
GABARAPL2	AL022328.4	0.61773	4.13213e-20	postive
WIPI2	AL022328.4	0.400364	3.07239e-08	postive
PEBP1	AL022328.4	0.575312	4.49029e-17	postive
ANO6	AL022328.4	-0.403966	2.24764e-08	negative
HMOX1	AL133371.2	0.424151	3.63607e-09	postive
TSC22D3	AL133371.2	0.546394	3.04359e-15	postive
IL33	AL133371.2	0.502759	8.59823e-13	postive
HIC1	AL133371.2	0.472179	2.85556e-11	postive
CYBB	AL133371.2	0.499513	1.26807e-12	postive
FLT3	AL133371.2	0.43933	8.52051e-10	postive
EPAS1	AL133371.2	0.480042	1.19903e-11	postive
TNFAIP3	AL133371.2	0.545053	3.66529e-15	postive
TLR4	AL133371.2	0.43439	1.37717e-09	postive
ATM	AL133371.2	0.635636	1.55388e-21	postive
DDIT4	AC023157.2	0.448628	3.37916e-10	postive
DDIT3	AC023157.2	0.410087	1.31021e-08	postive
RELA	AC023157.2	0.443539	5.6255e-10	postive
EGFR	AC023157.2	0.51441	2.05994e-13	postive
YY1AP1	AC023157.2	0.452136	2.36655e-10	postive
TP53	LINC02154	0.444659	5.03228e-10	postive
NF2	LINC02154	0.482219	9.39161e-12	postive
AURKA	LINC02154	0.493534	2.56657e-12	postive
MUC1	AL022322.1	0.405501	1.96518e-08	postive
HELLS	AL022322.1	0.425831	3.10766e-09	postive
SRC	AL022322.1	0.450306	2.85139e-10	postive
GPX2	AL022322.1	0.406863	1.74332e-08	postive
DRD4	AL022322.1	0.519313	1.11078e-13	postive
ALOX5	AL022322.1	0.421832	4.5103e-09	postive
PHKG2	AL022322.1	0.605437	3.48978e-19	postive
TAZ	AL022322.1	0.499283	1.30326e-12	postive
ISCU	AL049838.1	0.478982	1.3495e-11	postive
GPT2	AL049838.1	-0.408877	1.45896e-08	negative
RGS4	AL049838.1	0.426643	2.8793e-09	postive
ULK2	AL049838.1	0.561098	3.7544e-16	postive
ZEB1	AL049838.1	0.414221	9.04372e-09	postive
NFS1	AC018638.6	0.586791	7.48617e-18	postive
ENPP2	AC018638.6	0.481794	9.85229e-12	postive
CHMP6	AC018638.6	0.421345	4.71829e-09	postive
MT3	AC018638.6	0.651304	7.33938e-23	postive
BNIP3	AC018638.6	0.607256	2.56017e-19	postive
VLDLR	AC018638.6	0.669727	1.5971e-24	postive
ZNF419	AC018638.6	0.506735	5.31264e-13	postive
RGS4	AC018638.6	0.696898	3.32949e-27	postive
SLC2A8	AC018638.6	0.440219	7.80917e-10	postive
ALOX12B	AC018638.6	0.599308	9.77269e-19	postive
ULK1	AC018638.6	0.551289	1.53397e-15	postive
ATG4D	AC018638.6	0.650771	8.16557e-23	postive
MAP1LC3A	AC018638.6	0.426385	2.95004e-09	postive
WIPI2	AC018638.6	0.418815	5.95479e-09	postive
PEBP1	AC018638.6	0.508328	4.37266e-13	postive
SOCS1	AC018638.6	0.554832	9.27576e-16	postive
CDO1	AC018638.6	0.716886	2.24251e-29	postive
FBXW7	AC018638.6	0.475618	1.95898e-11	postive
LONP1	AC018638.6	0.60367	4.70704e-19	postive
GPX4	AC127024.6	0.407876	1.59421e-08	postive
NFS1	AC127024.6	0.4979	1.53578e-12	postive
ENPP2	AC127024.6	0.433667	1.47642e-09	postive
ISCU	AC127024.6	0.488991	4.34521e-12	postive
CHMP6	AC127024.6	0.430383	2.02148e-09	postive
GCH1	AC127024.6	0.534902	1.45694e-14	postive
MT3	AC127024.6	0.48634	5.88781e-12	postive
BNIP3	AC127024.6	0.458154	1.27223e-10	postive
SLC1A4	AC127024.6	0.452517	2.27608e-10	postive
VLDLR	AC127024.6	0.563015	2.83642e-16	postive
ZNF419	AC127024.6	0.513693	2.25287e-13	postive
ATP6V1G2	AC127024.6	0.537732	9.9614e-15	postive
RGS4	AC127024.6	0.544338	4.04557e-15	postive
SLC2A8	AC127024.6	0.4807	1.1139e-11	postive
NRAS	AC127024.6	-0.441945	6.58757e-10	negative
HRAS	AC127024.6	0.439633	8.27092e-10	postive
ALOX12B	AC127024.6	0.41807	6.37538e-09	postive
ULK1	AC127024.6	0.586669	7.63194e-18	postive
ATG4D	AC127024.6	0.531962	2.15421e-14	postive
MAP1LC3A	AC127024.6	0.626298	8.82993e-21	postive
GABARAPL2	AC127024.6	0.556611	7.18907e-16	postive
WIPI2	AC127024.6	0.422898	4.08599e-09	postive
PEBP1	AC127024.6	0.682818	8.86983e-26	postive
CDO1	AC127024.6	0.538432	9.06353e-15	postive
ANO6	AC127024.6	-0.426175	3.00877e-09	negative
BACH1	AC127024.6	-0.449571	3.072e-10	negative
LONP1	AC127024.6	0.553815	1.07235e-15	postive
CISD1	AL359504.1	0.60088	7.52016e-19	postive
FADS2	AL359504.1	0.447868	3.64842e-10	postive
ISCU	AL359504.1	0.472186	2.85338e-11	postive
SLC1A4	AL359504.1	0.621705	2.03155e-20	postive
ZNF419	AL359504.1	0.418424	6.172e-09	postive
ATP6V1G2	AL359504.1	0.629604	4.80484e-21	postive
TUBE1	AL359504.1	0.409225	1.41456e-08	postive
STMN1	AL359504.1	0.48106	1.06984e-11	postive
YWHAE	AL359504.1	0.46733	4.82381e-11	postive
GABPB1	AL359504.1	0.601648	6.61287e-19	postive
HRAS	AL359504.1	0.424381	3.55901e-09	postive
MAP1LC3A	AL359504.1	0.603769	4.62927e-19	postive
GABARAPL2	AL359504.1	0.70475	4.90833e-28	postive
ULK2	AL359504.1	0.432602	1.6354e-09	postive
PEBP1	AL359504.1	0.625367	1.04663e-20	postive
NOX4	LINC02544	0.744018	1.2131e-32	postive
GPX4	AL139246.5	0.45637	1.53119e-10	postive
CISD1	AL139246.5	0.41632	7.47807e-09	postive
OTUB1	AL139246.5	0.48759	5.10346e-12	postive
CHMP6	AL139246.5	0.430672	1.96667e-09	postive
GABPB1	AL139246.5	0.411387	1.16665e-08	postive
HRAS	AL139246.5	0.534768	1.48307e-14	postive
PHKG2	AL139246.5	0.498315	1.46217e-12	postive
MAP1LC3A	AL139246.5	0.491173	3.37741e-12	postive
GABARAPL2	AL139246.5	0.434453	1.36877e-09	postive
ANO6	AL139246.5	-0.420984	4.87784e-09	negative
IL33	AC002398.2	0.437399	1.0289e-09	postive
PLIN4	AC002398.2	0.492186	3.00277e-12	postive
CISD1	AL049780.2	0.420125	5.2798e-09	postive
SLC1A4	AL049780.2	0.450849	2.69834e-10	postive
ATP6V1G2	AL049780.2	0.432636	1.63006e-09	postive
TUBE1	AL049780.2	0.438763	9.00674e-10	postive
SETD1B	AL049780.2	0.489543	4.07798e-12	postive
GABPB1	AL049780.2	0.518169	1.28405e-13	postive
GABARAPL2	AL049780.2	0.525048	5.32455e-14	postive
PEBP1	AL049780.2	0.45321	2.12019e-10	postive
DRD4	AC040169.3	0.400944	2.92218e-08	postive
PHKG2	AC040169.3	0.405859	1.90436e-08	postive
SAT1	AC040169.3	0.403329	2.37597e-08	postive
DRD4	AP006621.2	0.458118	1.27708e-10	postive
ALOX5	AP006621.2	0.44629	4.27539e-10	postive
ALOX12	AP006621.2	0.43309	1.56065e-09	postive
PHKG2	AP006621.2	0.539127	8.24971e-15	postive
TAZ	AP006621.2	0.563791	2.5305e-16	postive
ASNS	Z92544.1	0.514978	1.91866e-13	postive
SLC7A11	AC093904.4	0.492273	2.97274e-12	postive
ASNS	AC093904.4	0.484416	7.32746e-12	postive
SLC1A5	AC093904.4	0.492291	2.96648e-12	postive
WIPI1	AC093904.4	0.492313	2.95903e-12	postive
ZNF419	AC015849.3	0.406281	1.83492e-08	postive
TUBE1	AC015849.3	0.443515	5.63873e-10	postive
SETD1B	AC015849.3	0.425139	3.31576e-09	postive
ALOX12	AC015849.3	0.545332	3.52645e-15	postive
YY1AP1	AC015849.3	0.454114	1.93246e-10	postive
FBXW7	AC015849.3	0.41602	7.6841e-09	postive
BRD4	FMR1-IT1	0.421101	4.82553e-09	postive
ALOX12	FMR1-IT1	0.529487	2.98519e-14	postive
LPIN1	FMR1-IT1	0.404406	2.16292e-08	postive
YY1AP1	FMR1-IT1	0.405599	1.94833e-08	postive
ISCU	AC104532.2	0.411181	1.18835e-08	postive
ATP6V1G2	AC104532.2	0.418093	6.36159e-09	postive
TUBE1	AC104532.2	0.577738	3.0931e-17	postive
SETD1B	AC104532.2	0.592871	2.81552e-18	postive
ALOX12	AC104532.2	0.489866	3.92872e-12	postive
ALOX12B	AC104532.2	0.424006	3.68561e-09	postive
ULK2	AC104532.2	0.54573	3.3372e-15	postive
CDO1	AC104532.2	0.452309	2.32496e-10	postive
ATM	AC104532.2	0.50487	6.66414e-13	postive
FBXW7	AC104532.2	0.40375	2.29035e-08	postive
GPX4	LINC01023	0.538897	8.51014e-15	postive
CISD1	LINC01023	0.509846	3.62899e-13	postive
ISCU	LINC01023	0.400867	2.94185e-08	postive
OTUB1	LINC01023	0.444545	5.08958e-10	postive
CHMP6	LINC01023	0.548484	2.27471e-15	postive
MT3	LINC01023	0.446813	4.05667e-10	postive
SLC1A4	LINC01023	0.553114	1.18473e-15	postive
ZNF419	LINC01023	0.430847	1.93403e-09	postive
ATP6V1G2	LINC01023	0.525978	4.72021e-14	postive
SLC2A8	LINC01023	0.530459	2.62703e-14	postive
STMN1	LINC01023	0.437553	1.01356e-09	postive
GABPB1	LINC01023	0.46352	7.24107e-11	postive
PIK3CA	LINC01023	-0.428139	2.50086e-09	negative
NRAS	LINC01023	-0.475536	1.97678e-11	negative
HRAS	LINC01023	0.635106	1.71748e-21	postive
KEAP1	LINC01023	0.44094	7.27422e-10	postive
PHKG2	LINC01023	0.439608	8.29182e-10	postive
ULK1	LINC01023	0.446682	4.11028e-10	postive
ATG4D	LINC01023	0.51186	2.82973e-13	postive
MAP1LC3A	LINC01023	0.740884	3.03441e-32	postive
GABARAPL2	LINC01023	0.678732	2.22203e-25	postive
WIPI2	LINC01023	0.430166	2.06374e-09	postive
PEBP1	LINC01023	0.618734	3.4572e-20	postive
ANO6	LINC01023	-0.567669	1.42455e-16	negative
MTDH	LINC01023	-0.433074	1.56308e-09	negative
BACH1	LINC01023	-0.462439	8.11785e-11	negative
LONP1	LINC01023	0.5257	4.89348e-14	postive
TUBE1	Z84485.1	0.42896	2.31399e-09	postive
TF	Z84485.1	0.417427	6.76075e-09	postive
ALOX12	Z84485.1	0.672446	8.86974e-25	postive
ATM	Z84485.1	0.489935	3.8975e-12	postive
TAZ	Z84485.1	0.466654	5.18621e-11	postive
FBXW7	Z84485.1	0.517648	1.37149e-13	postive
NFS1	AC107952.2	0.544582	3.91176e-15	postive
ENPP2	AC107952.2	0.630609	3.98825e-21	postive
ISCU	AC107952.2	0.464752	6.35326e-11	postive
GCH1	AC107952.2	0.47972	1.24289e-11	postive
MT3	AC107952.2	0.678429	2.37735e-25	postive
BNIP3	AC107952.2	0.597276	1.36844e-18	postive
SLC1A4	AC107952.2	0.457752	1.32667e-10	postive
VLDLR	AC107952.2	0.699065	1.9752e-27	postive
ZNF419	AC107952.2	0.48691	5.51685e-12	postive
ATP6V1G2	AC107952.2	0.406464	1.80575e-08	postive
RGS4	AC107952.2	0.653056	5.15861e-23	postive
SLC2A8	AC107952.2	0.470557	3.40608e-11	postive
ALOX12B	AC107952.2	0.604079	4.39278e-19	postive
ULK1	AC107952.2	0.569566	1.07273e-16	postive
ATG4D	AC107952.2	0.577213	3.35369e-17	postive
GABARAPL2	AC107952.2	0.421924	4.47187e-09	postive
WIPI2	AC107952.2	0.523707	6.3312e-14	postive
PEBP1	AC107952.2	0.569615	1.06484e-16	postive
SOCS1	AC107952.2	0.543413	4.5954e-15	postive
CDO1	AC107952.2	0.648689	1.23693e-22	postive
FBXW7	AC107952.2	0.492007	3.06603e-12	postive
LONP1	AC107952.2	0.624347	1.25996e-20	postive
VLDLR	AC011451.1	0.405072	2.04043e-08	postive
ZNF419	AC011451.1	0.407649	1.62656e-08	postive
RGS4	AC011451.1	0.464426	6.57721e-11	postive
ELAVL1	AC011451.1	0.427329	2.6994e-09	postive
CDO1	AC011451.1	0.498841	1.37366e-12	postive
GPX4	SPINT1-AS1	0.47403	2.33253e-11	postive
HSPB1	SPINT1-AS1	0.423552	3.84493e-09	postive
NQO1	SPINT1-AS1	0.430563	1.98716e-09	postive
STAT3	SPINT1-AS1	-0.41191	1.11334e-08	negative
OTUB1	SPINT1-AS1	0.577238	3.34071e-17	postive
AIFM2	SPINT1-AS1	0.454258	1.90404e-10	postive
GPX2	SPINT1-AS1	0.41078	1.23166e-08	postive
ZFP69B	SPINT1-AS1	-0.472998	2.6116e-11	negative
CYBB	SPINT1-AS1	-0.453692	2.01792e-10	negative
PIK3CA	SPINT1-AS1	-0.433941	1.43803e-09	negative
HRAS	SPINT1-AS1	0.511768	2.86189e-13	postive
PHKG2	SPINT1-AS1	0.592787	2.8542e-18	postive
MAPK1	SPINT1-AS1	-0.433495	1.50106e-09	negative
ZEB1	SPINT1-AS1	-0.532577	1.98547e-14	negative
ANO6	SPINT1-AS1	-0.45063	2.75905e-10	negative
TLR4	SPINT1-AS1	-0.527122	4.06762e-14	negative
EGLN2	SPINT1-AS1	0.434194	1.40337e-09	postive
CISD1	AL390955.2	0.47527	2.03565e-11	postive
FADS2	AL390955.2	0.499211	1.31455e-12	postive
ISCU	AL390955.2	0.538982	8.41314e-15	postive
GCH1	AL390955.2	0.506993	5.14778e-13	postive
SLC1A4	AL390955.2	0.533892	1.667e-14	postive
ATP6V1G2	AL390955.2	0.612429	1.04888e-19	postive
GABARAPL2	AL390955.2	0.52309	6.85447e-14	postive
ULK2	AL390955.2	0.588529	5.67222e-18	postive
PEBP1	AL390955.2	0.536411	1.19009e-14	postive
GPX4	AL162274.2	0.527304	3.97249e-14	postive
ACSL3	AL162274.2	-0.416662	7.24859e-09	negative
CHMP6	AL162274.2	0.496181	1.88152e-12	postive
ZNF419	AL162274.2	0.40461	2.1247e-08	postive
NRAS	AL162274.2	-0.427979	2.53884e-09	negative
HRAS	AL162274.2	0.434578	1.3524e-09	postive
PHKG2	AL162274.2	0.526028	4.68972e-14	postive
ATG4D	AL162274.2	0.407348	1.67034e-08	postive
MAP1LC3A	AL162274.2	0.50025	1.16139e-12	postive
MAPK1	AL162274.2	-0.467864	4.55489e-11	negative
SOCS1	AL162274.2	0.494402	2.31882e-12	postive
ANO6	AL162274.2	-0.472832	2.65927e-11	negative
EGLN2	AL162274.2	0.555403	8.54842e-16	postive
TAZ	AL162274.2	0.56259	3.0187e-16	postive
MTDH	AL162274.2	-0.515032	1.90581e-13	negative
LONP1	AL162274.2	0.428279	2.46792e-09	postive
ALOX12	AC138932.4	0.411318	1.17391e-08	postive
GABPB1	AC010883.1	0.563435	2.66641e-16	postive
HRAS	AC010883.1	0.412122	1.09236e-08	postive
PHKG2	AC010883.1	0.458131	1.27533e-10	postive
MAP1LC3A	AC010883.1	0.480164	1.18273e-11	postive
TAZ	AC010883.1	0.451258	2.5883e-10	postive
TUBE1	AC253536.3	0.410383	1.27614e-08	postive
SETD1B	AC253536.3	0.436983	1.07141e-09	postive
ALOX12	AC253536.3	0.40349	2.34294e-08	postive
PRKAA1	AC253536.3	0.475871	1.90507e-11	postive
CISD1	AC010504.1	0.442342	6.33422e-10	postive
FADS2	AC010504.1	0.449815	2.99677e-10	postive
NFS1	AC010504.1	0.433846	1.45123e-09	postive
ISCU	AC010504.1	0.499688	1.24187e-12	postive
GCH1	AC010504.1	0.481488	1.01963e-11	postive
SLC1A4	AC010504.1	0.640349	6.31925e-22	postive
VLDLR	AC010504.1	0.405389	1.98454e-08	postive
ZNF419	AC010504.1	0.456322	1.53888e-10	postive
ATP6V1G2	AC010504.1	0.613658	8.46482e-20	postive
YWHAE	AC010504.1	0.452576	2.26244e-10	postive
GABPB1	AC010504.1	0.51217	2.72294e-13	postive
ALOX12B	AC010504.1	0.42149	4.65533e-09	postive
ATG4D	AC010504.1	0.417987	6.42346e-09	postive
MAP1LC3A	AC010504.1	0.529726	2.89321e-14	postive
GABARAPL2	AC010504.1	0.657759	1.97897e-23	postive
ATG13	AC010504.1	0.442518	6.22495e-10	postive
ULK2	AC010504.1	0.436402	1.13359e-09	postive
PEBP1	AC010504.1	0.609548	1.72763e-19	postive
TUBE1	AL031709.1	0.43325	1.53682e-09	postive
ALOX12	AL031709.1	0.483313	8.3015e-12	postive
TAZ	AL031709.1	0.427637	2.62217e-09	postive
FADS2	AC002094.4	0.45215	2.36323e-10	postive
ISCU	AC002094.4	0.439927	8.03627e-10	postive
SLC1A4	AC002094.4	0.401057	2.89375e-08	postive
ATP6V1G2	AC002094.4	0.468786	4.1246e-11	postive
GABPB1	AC002094.4	0.50933	3.8669e-13	postive
MAP1LC3A	AC002094.4	0.481077	1.06783e-11	postive
GABARAPL2	AC002094.4	0.439691	8.22402e-10	postive
PEBP1	AC002094.4	0.477997	1.50581e-11	postive
NNMT	MAP3K4-AS1	0.400402	3.06221e-08	postive
HIC1	MAP3K4-AS1	0.572563	6.82499e-17	postive
HNF4A	MAP3K4-AS1	-0.401151	2.87041e-08	negative
NOX4	MAP3K4-AS1	0.424163	3.63211e-09	postive
FADS2	ZNF790-AS1	0.419311	5.68997e-09	postive
NFS1	ZNF790-AS1	0.463961	6.9101e-11	postive
ENPP2	ZNF790-AS1	0.537635	1.00932e-14	postive
ISCU	ZNF790-AS1	0.463149	7.53093e-11	postive
GCH1	ZNF790-AS1	0.517242	1.4436e-13	postive
MT3	ZNF790-AS1	0.455198	1.72829e-10	postive
BNIP3	ZNF790-AS1	0.500637	1.10894e-12	postive
SLC1A4	ZNF790-AS1	0.456766	1.46958e-10	postive
VLDLR	ZNF790-AS1	0.581795	1.64675e-17	postive
ZNF419	ZNF790-AS1	0.534482	1.54093e-14	postive
ATP6V1G2	ZNF790-AS1	0.488544	4.57447e-12	postive
RGS4	ZNF790-AS1	0.520476	9.57951e-14	postive
ULK1	ZNF790-AS1	0.509581	3.74916e-13	postive
ATG4D	ZNF790-AS1	0.503771	7.61089e-13	postive
GABARAPL2	ZNF790-AS1	0.630369	4.16986e-21	postive
DPP4	ZNF790-AS1	0.516496	1.58581e-13	postive
PEBP1	ZNF790-AS1	0.673479	7.08142e-25	postive
CDO1	ZNF790-AS1	0.45036	2.8356e-10	postive
FBXW7	ZNF790-AS1	0.429459	2.20696e-09	postive
LONP1	ZNF790-AS1	0.441505	6.88031e-10	postive
SLC3A2	TUBA3FP	0.431167	1.87601e-09	postive
FADS2	TUBA3FP	0.55131	1.52942e-15	postive
NFS1	TUBA3FP	0.500637	1.10899e-12	postive
ENPP2	TUBA3FP	0.703007	7.54863e-28	postive
CISD2	TUBA3FP	0.402881	2.47044e-08	postive
ISCU	TUBA3FP	0.490345	3.71733e-12	postive
SESN2	TUBA3FP	0.484519	7.24225e-12	postive
GCH1	TUBA3FP	0.832494	5.24363e-47	postive
MT3	TUBA3FP	0.558833	5.21809e-16	postive
BNIP3	TUBA3FP	0.520048	1.01165e-13	postive
SLC1A4	TUBA3FP	0.672907	8.0231e-25	postive
VLDLR	TUBA3FP	0.655672	3.034e-23	postive
ZNF419	TUBA3FP	0.427618	2.62694e-09	postive
ATP6V1G2	TUBA3FP	0.660528	1.11691e-23	postive
RGS4	TUBA3FP	0.591892	3.30006e-18	postive
SLC2A8	TUBA3FP	0.430977	1.91023e-09	postive
STMN1	TUBA3FP	0.447676	3.71982e-10	postive
YWHAE	TUBA3FP	0.45286	2.19775e-10	postive
ULK1	TUBA3FP	0.531306	2.3493e-14	postive
ATG4D	TUBA3FP	0.468073	4.45358e-11	postive
MAP1LC3A	TUBA3FP	0.504786	6.73168e-13	postive
GABARAPL2	TUBA3FP	0.616908	4.77976e-20	postive
DPP4	TUBA3FP	0.574633	4.98136e-17	postive
PEBP1	TUBA3FP	0.687081	3.34815e-26	postive
CDO1	TUBA3FP	0.48846	4.61884e-12	postive
MAPK9	TUBA3FP	0.43932	8.52858e-10	postive
LONP1	TUBA3FP	0.512448	2.6305e-13	postive
HIC1	ACTA2-AS1	0.415965	7.7227e-09	postive
NOX4	ACTA2-AS1	0.520536	9.50664e-14	postive
ALOX15B	ACTA2-AS1	0.406674	1.77264e-08	postive
ZEB1	ACTA2-AS1	0.482291	9.31656e-12	postive
OTUB1	SNHG3	0.407337	1.67193e-08	postive
DRD4	SNHG3	0.468315	4.33922e-11	postive
PHKG2	SNHG3	0.648571	1.2661e-22	postive
TAZ	SNHG3	0.57214	7.27755e-17	postive
DUSP1	AC133644.1	0.422505	4.23747e-09	postive
TSC22D3	AC133644.1	0.537474	1.03155e-14	postive
HBA1	AC133644.1	0.414045	9.1887e-09	postive
TNFAIP3	AC133644.1	0.461546	8.91898e-11	postive
ATM	AC133644.1	0.527324	3.96205e-14	postive
CISD1	LINC02696	0.628037	6.4176e-21	postive
FADS2	LINC02696	0.409411	1.39138e-08	postive
SLC1A4	LINC02696	0.602534	5.69979e-19	postive
ATP6V1G2	LINC02696	0.501838	9.604e-13	postive
STMN1	LINC02696	0.403696	2.30128e-08	postive
YWHAE	LINC02696	0.448138	3.55066e-10	postive
GABPB1	LINC02696	0.565762	1.8916e-16	postive
MAP1LC3A	LINC02696	0.527831	3.70814e-14	postive
GABARAPL2	LINC02696	0.651489	7.07124e-23	postive
ATG13	LINC02696	0.452319	2.32272e-10	postive
PEBP1	LINC02696	0.576353	3.82823e-17	postive
CISD1	AC007663.3	0.671988	9.79661e-25	postive
FADS2	AC007663.3	0.423437	3.88628e-09	postive
SLC1A4	AC007663.3	0.531629	2.25122e-14	postive
ATP6V1G2	AC007663.3	0.441408	6.94593e-10	postive
YWHAE	AC007663.3	0.470075	3.58876e-11	postive
GABPB1	AC007663.3	0.551608	1.46623e-15	postive
MAP1LC3A	AC007663.3	0.491761	3.15479e-12	postive
GABARAPL2	AC007663.3	0.626965	7.81361e-21	postive
ATG13	AC007663.3	0.437226	1.04636e-09	postive
DPP4	AC007663.3	0.434843	1.31823e-09	postive
PEBP1	AC007663.3	0.507019	5.13196e-13	postive
CISD1	LINC01765	0.500463	1.13225e-12	postive
FADS2	LINC01765	0.459019	1.16256e-10	postive
ISCU	LINC01765	0.437746	9.94736e-10	postive
GCH1	LINC01765	0.434134	1.41155e-09	postive
SLC1A4	LINC01765	0.460238	1.02337e-10	postive
ATP6V1G2	LINC01765	0.4563	1.54231e-10	postive
GABPB1	LINC01765	0.444756	4.98375e-10	postive
ALOX12B	LINC01765	0.514005	2.16686e-13	postive
GABARAPL2	LINC01765	0.512998	2.4566e-13	postive
ULK2	LINC01765	0.477376	1.61307e-11	postive
DPP4	LINC01765	0.504006	7.3983e-13	postive
PEBP1	LINC01765	0.547671	2.54823e-15	postive
PHKG2	AL031186.1	0.414591	8.74652e-09	postive
TAZ	AL031186.1	0.46106	9.38747e-11	postive
CHAC1	AL590369.1	0.485852	6.22454e-12	postive
CXCL2	AL590369.1	0.408916	1.4539e-08	postive
HSF1	AC120498.4	0.481784	9.86299e-12	postive
DDIT4	AC120498.4	0.429442	2.21056e-09	postive
TF	AC120498.4	0.604688	3.96257e-19	postive
TFAP2C	AC120498.4	0.442109	6.48197e-10	postive
HILPDA	AC120498.4	0.426846	2.82511e-09	postive
TP63	MIRLET7BHG	0.449008	3.25183e-10	postive
OTUB1	MIRLET7BHG	0.428256	2.47327e-09	postive
DDIT4	MIRLET7BHG	0.421807	4.52095e-09	postive
DRD4	MIRLET7BHG	0.475245	2.04108e-11	postive
ACSF2	MIRLET7BHG	0.400774	2.96552e-08	postive
PHKG2	MIRLET7BHG	0.523415	6.5738e-14	postive
TAZ	MIRLET7BHG	0.403565	2.32769e-08	postive
NFS1	AC087500.2	0.621701	2.03298e-20	postive
ENPP2	AC087500.2	0.651863	6.5597e-23	postive
ISCU	AC087500.2	0.443877	5.43974e-10	postive
MT3	AC087500.2	0.631286	3.51596e-21	postive
BNIP3	AC087500.2	0.538122	9.4507e-15	postive
VLDLR	AC087500.2	0.615837	5.77446e-20	postive
ZNF419	AC087500.2	0.466616	5.20739e-11	postive
ATP6V1G2	AC087500.2	0.444781	4.97146e-10	postive
TUBE1	AC087500.2	0.462774	7.83551e-11	postive
RGS4	AC087500.2	0.593484	2.54802e-18	postive
SLC2A8	AC087500.2	0.40905	1.43673e-08	postive
ALOX12	AC087500.2	0.442922	5.98032e-10	postive
ALOX12B	AC087500.2	0.594976	1.99694e-18	postive
ULK1	AC087500.2	0.543036	4.83918e-15	postive
ATG4D	AC087500.2	0.621875	1.97038e-20	postive
GABARAPL2	AC087500.2	0.403908	2.25902e-08	postive
ULK2	AC087500.2	0.433994	1.43074e-09	postive
PEBP1	AC087500.2	0.521629	8.26761e-14	postive
SOCS1	AC087500.2	0.547674	2.54707e-15	postive
CDO1	AC087500.2	0.689591	1.87211e-26	postive
FBXW7	AC087500.2	0.591499	3.51701e-18	postive
LONP1	AC087500.2	0.548262	2.34654e-15	postive
TUBE1	AC025917.1	0.497837	1.54737e-12	postive
SETD1B	AC025917.1	0.521013	8.9456e-14	postive
ALOX12	AC025917.1	0.459171	1.14422e-10	postive
SP1	AC025917.1	0.400812	2.95582e-08	postive
GABPB1	AC025917.1	0.444573	5.07536e-10	postive
ATM	AC025917.1	0.615202	6.45797e-20	postive
SIRT1	AC025917.1	0.445734	4.51994e-10	postive
FBXW7	AC025917.1	0.426932	2.8023e-09	postive
SRC	AC254629.1	0.456582	1.49799e-10	postive
CEBPG	AC254629.1	0.408493	1.50945e-08	postive
HNF4A	AC254629.1	0.548096	2.40163e-15	postive
MAPK3	AC254629.1	0.473342	2.51507e-11	postive
LPIN1	AC254629.1	0.461484	8.97783e-11	postive
NQO1	LINC02041	0.463093	7.57553e-11	postive
MUC1	LINC02041	0.462611	7.97214e-11	postive
SRC	LINC02041	0.461774	8.70738e-11	postive
GPX2	LINC02041	0.421008	4.8673e-09	postive
RELA	LINC02041	0.46448	6.53933e-11	postive
CAPG	LINC02041	0.404755	2.0978e-08	postive
ATG16L1	LINC02041	0.4358	1.20174e-09	postive
ULK2	LINC02041	-0.408113	1.56118e-08	negative
GCLC	DNAJC3-DT	0.428262	2.47188e-09	postive
NFS1	DNAJC3-DT	0.545147	3.61797e-15	postive
ENPP2	DNAJC3-DT	0.673152	7.60515e-25	postive
CISD2	DNAJC3-DT	0.402838	2.47981e-08	postive
GCH1	DNAJC3-DT	0.496796	1.74994e-12	postive
MT3	DNAJC3-DT	0.427824	2.57639e-09	postive
BNIP3	DNAJC3-DT	0.492976	2.73898e-12	postive
VLDLR	DNAJC3-DT	0.549281	2.03448e-15	postive
ATP6V1G2	DNAJC3-DT	0.454775	1.80532e-10	postive
RGS4	DNAJC3-DT	0.626382	8.69417e-21	postive
ALOX12B	DNAJC3-DT	0.658056	1.8619e-23	postive
ULK1	DNAJC3-DT	0.505438	6.22e-13	postive
ATG4D	DNAJC3-DT	0.591274	3.64737e-18	postive
ULK2	DNAJC3-DT	0.487019	5.44827e-12	postive
PEBP1	DNAJC3-DT	0.49657	1.79725e-12	postive
CDO1	DNAJC3-DT	0.760705	7.27966e-35	postive
LONP1	DNAJC3-DT	0.556783	7.01346e-16	postive
NQO1	AL117382.1	0.509581	3.74913e-13	postive
GPX2	AL117382.1	0.415486	8.06603e-09	postive
ASNS	AL117382.1	0.415799	7.83993e-09	postive
CEBPG	AL117382.1	0.487231	5.31809e-12	postive
HNF4A	AL117382.1	0.635852	1.49136e-21	postive
MAPK3	AL117382.1	0.497057	1.69692e-12	postive
PHKG2	AC113139.1	0.415966	7.72223e-09	postive
DRD4	AC005387.1	0.532407	2.03091e-14	postive
PHKG2	AC005387.1	0.644439	2.85756e-22	postive
EGLN2	AC005387.1	0.427168	2.74063e-09	postive
TAZ	AC005387.1	0.651523	7.02415e-23	postive
TUBE1	SOS1-IT1	0.424918	3.38499e-09	postive
PIK3CA	SOS1-IT1	0.409313	1.40364e-08	postive
ATM	SOS1-IT1	0.543507	4.53594e-15	postive
SIRT1	SOS1-IT1	0.454755	1.80902e-10	postive
TUBE1	AC129510.1	0.558593	5.40244e-16	postive
SETD1B	AC129510.1	0.451194	2.60511e-10	postive
ALOX12	AC129510.1	0.55399	1.04583e-15	postive
ULK1	AC129510.1	0.401466	2.79331e-08	postive
CAV1	AC005479.1	0.41957	5.55611e-09	postive
EGFR	AC005479.1	0.408744	1.47624e-08	postive
CISD1	DNAJC27-AS1	0.540868	6.51045e-15	postive
FADS2	DNAJC27-AS1	0.512966	2.46648e-13	postive
ISCU	DNAJC27-AS1	0.429953	2.10593e-09	postive
GCH1	DNAJC27-AS1	0.646189	2.02736e-22	postive
MT3	DNAJC27-AS1	0.41305	1.00499e-08	postive
SLC1A4	DNAJC27-AS1	0.764851	1.91355e-35	postive
ATP6V1G2	DNAJC27-AS1	0.812756	3.74163e-43	postive
STMN1	DNAJC27-AS1	0.57956	2.33303e-17	postive
YWHAE	DNAJC27-AS1	0.478522	1.42039e-11	postive
HRAS	DNAJC27-AS1	0.441441	6.92392e-10	postive
MAP1LC3A	DNAJC27-AS1	0.674105	6.17515e-25	postive
GABARAPL2	DNAJC27-AS1	0.733501	2.49802e-31	postive
PEBP1	DNAJC27-AS1	0.680707	1.42819e-25	postive
CISD1	AC008438.1	0.467514	4.72917e-11	postive
FADS2	AC008438.1	0.473635	2.4358e-11	postive
NFS1	AC008438.1	0.583496	1.26104e-17	postive
ENPP2	AC008438.1	0.603017	5.25477e-19	postive
ISCU	AC008438.1	0.512791	2.52061e-13	postive
CHMP6	AC008438.1	0.419	5.85485e-09	postive
GCH1	AC008438.1	0.595553	1.8168e-18	postive
MT3	AC008438.1	0.577842	3.04381e-17	postive
BNIP3	AC008438.1	0.532742	1.9424e-14	postive
SLC1A4	AC008438.1	0.662708	7.08792e-24	postive
VLDLR	AC008438.1	0.651208	7.48216e-23	postive
ZNF419	AC008438.1	0.48775	5.01079e-12	postive
ATP6V1G2	AC008438.1	0.578567	2.72095e-17	postive
RGS4	AC008438.1	0.564396	2.31475e-16	postive
SETD1B	AC008438.1	0.412032	1.10122e-08	postive
SLC2A8	AC008438.1	0.462249	8.28259e-11	postive
YWHAE	AC008438.1	0.480886	1.09086e-11	postive
GABPB1	AC008438.1	0.439795	8.14042e-10	postive
ALOX12B	AC008438.1	0.522697	7.21018e-14	postive
ULK1	AC008438.1	0.563494	2.6436e-16	postive
ATG4D	AC008438.1	0.617642	4.19777e-20	postive
MAP1LC3A	AC008438.1	0.556724	7.07279e-16	postive
GABARAPL2	AC008438.1	0.666172	3.41442e-24	postive
WIPI2	AC008438.1	0.419304	5.69353e-09	postive
ULK2	AC008438.1	0.418707	6.0142e-09	postive
DPP4	AC008438.1	0.546345	3.06459e-15	postive
PEBP1	AC008438.1	0.711947	8.02593e-29	postive
CDO1	AC008438.1	0.529087	3.14628e-14	postive
MAPK9	AC008438.1	0.44898	3.26109e-10	postive
ANO6	AC008438.1	-0.421906	4.47936e-09	negative
FBXW7	AC008438.1	0.42895	2.31619e-09	postive
LONP1	AC008438.1	0.598283	1.15851e-18	postive
ENPP2	AC027807.2	0.67327	7.41149e-25	postive
GCH1	AC027807.2	0.429709	2.15518e-09	postive
VLDLR	AC027807.2	0.409724	1.35326e-08	postive
GABARAPL1	AC027807.2	0.413689	9.48822e-09	postive
ULK2	AC027807.2	0.446081	4.36547e-10	postive
DPP4	AC027807.2	0.407308	1.67623e-08	postive
CHAC1	AC116407.1	0.472739	2.68624e-11	postive
MAP1LC3A	AC116407.1	0.512438	2.63369e-13	postive
GCH1	AC093702.1	0.528584	3.36036e-14	postive
MT3	AC093702.1	0.430436	2.01124e-09	postive
SLC1A4	AC093702.1	0.663581	5.90136e-24	postive
ATP6V1G2	AC093702.1	0.685179	5.18202e-26	postive
STMN1	AC093702.1	0.640509	6.1278e-22	postive
MAP1LC3A	AC093702.1	0.513022	2.44948e-13	postive
GABARAPL2	AC093702.1	0.509058	3.99827e-13	postive
NFS1	AL158071.2	0.421287	4.74345e-09	postive
CHMP6	AL158071.2	0.40313	2.41751e-08	postive
MT3	AL158071.2	0.623588	1.44609e-20	postive
BNIP3	AL158071.2	0.426599	2.89127e-09	postive
SLC1A4	AL158071.2	0.446619	4.13628e-10	postive
VLDLR	AL158071.2	0.480046	1.19838e-11	postive
ATP6V1G2	AL158071.2	0.429091	2.28528e-09	postive
SLC2A8	AL158071.2	0.596328	1.59975e-18	postive
STMN1	AL158071.2	0.425045	3.345e-09	postive
MAP1LC3A	AL158071.2	0.48845	4.6245e-12	postive
GABARAPL2	AL158071.2	0.418727	6.00313e-09	postive
WIPI2	AL158071.2	0.479879	1.22106e-11	postive
PEBP1	AL158071.2	0.431881	1.75231e-09	postive
SOCS1	AL158071.2	0.442211	6.41684e-10	postive
LONP1	AL158071.2	0.415425	8.11026e-09	postive
ENPP2	SSTR5-AS1	0.419617	5.53254e-09	postive
GCH1	SSTR5-AS1	0.422559	4.21634e-09	postive
ATP6V1G2	SSTR5-AS1	0.424241	3.60589e-09	postive
ALOX12B	SSTR5-AS1	0.408544	1.50264e-08	postive
PEBP1	SSTR5-AS1	0.410389	1.27545e-08	postive
GPX4	AC027307.2	0.656399	2.61522e-23	postive
OTUB1	AC027307.2	0.441734	6.72661e-10	postive
RPL8	AC027307.2	0.416596	7.29225e-09	postive
HRAS	AC027307.2	0.429594	2.17881e-09	postive
KEAP1	AC027307.2	0.479809	1.23062e-11	postive
PHKG2	AC027307.2	0.442523	6.22132e-10	postive
MAP1LC3A	AC027307.2	0.411203	1.18606e-08	postive
EGLN2	AC027307.2	0.461522	8.94163e-11	postive
HNF4A	AC020978.4	0.42551	3.20235e-09	postive
ACVR1B	AC020978.4	0.465702	5.74177e-11	postive
ENPP2	STXBP5-AS1	0.554378	9.89571e-16	postive
CISD2	STXBP5-AS1	0.405154	2.0259e-08	postive
SESN2	STXBP5-AS1	0.411975	1.10685e-08	postive
GCH1	STXBP5-AS1	0.558559	5.4293e-16	postive
ASNS	STXBP5-AS1	0.571864	7.58777e-17	postive
SLC1A4	STXBP5-AS1	0.45972	1.08039e-10	postive
VLDLR	STXBP5-AS1	0.415082	8.36642e-09	postive
ATP6V1G2	STXBP5-AS1	0.460926	9.52074e-11	postive
TUBE1	STXBP5-AS1	0.401214	2.85475e-08	postive
RGS4	STXBP5-AS1	0.419201	5.74757e-09	postive
RELA	STXBP5-AS1	-0.413721	9.46121e-09	negative
YWHAE	STXBP5-AS1	0.456063	1.58064e-10	postive
ALOX12B	STXBP5-AS1	0.521934	7.95074e-14	postive
ULK1	STXBP5-AS1	0.477392	1.61027e-11	postive
ATG4D	STXBP5-AS1	0.474846	2.13268e-11	postive
ULK2	STXBP5-AS1	0.458277	1.25613e-10	postive
DPP4	STXBP5-AS1	0.406244	1.84098e-08	postive
CDO1	STXBP5-AS1	0.512661	2.56194e-13	postive
MT3	SMIM2-AS1	0.564457	2.2939e-16	postive
BNIP3	SMIM2-AS1	0.408777	1.47194e-08	postive
VLDLR	SMIM2-AS1	0.460962	9.48456e-11	postive
VEGFA	SMIM2-AS1	0.545773	3.31782e-15	postive
RGS4	SMIM2-AS1	0.461495	8.96727e-11	postive
ATG4D	SMIM2-AS1	0.516987	1.49077e-13	postive
SOCS1	SMIM2-AS1	0.458019	1.29032e-10	postive
CDO1	SMIM2-AS1	0.419284	5.70399e-09	postive
LONP1	SMIM2-AS1	0.437037	1.06578e-09	postive
CISD1	AC008969.1	0.460871	9.57586e-11	postive
ISCU	AC008969.1	0.461903	8.59038e-11	postive
SLC1A4	AC008969.1	0.453495	2.05915e-10	postive
ZNF419	AC008969.1	0.484265	7.45399e-12	postive
ATP6V1G2	AC008969.1	0.503889	7.50346e-13	postive
TUBE1	AC008969.1	0.481396	1.03022e-11	postive
SETD1B	AC008969.1	0.543445	4.575e-15	postive
GABPB1	AC008969.1	0.604638	3.99642e-19	postive
MAP1LC3A	AC008969.1	0.496426	1.82809e-12	postive
GABARAPL2	AC008969.1	0.597635	1.28966e-18	postive
ULK2	AC008969.1	0.443313	5.75285e-10	postive
PEBP1	AC008969.1	0.602709	5.53401e-19	postive
FBXW7	AC008969.1	0.429641	2.16925e-09	postive
HELLS	AL731571.1	0.410128	1.30543e-08	postive
SRC	AL731571.1	0.435243	1.26825e-09	postive
ALOX5	AL731571.1	0.415039	8.39921e-09	postive
ALOX12	AL731571.1	0.500198	1.16862e-12	postive
ATG16L1	AL731571.1	0.505064	6.5094e-13	postive
PRKAA1	AL731571.1	0.412879	1.02058e-08	postive
YY1AP1	AL731571.1	0.456855	1.45619e-10	postive
ATP6V1G2	AC069120.1	0.409816	1.34216e-08	postive
CISD1	SNHG19	0.681633	1.15949e-25	postive
SLC1A4	SNHG19	0.467315	4.83164e-11	postive
YWHAE	SNHG19	0.410744	1.23571e-08	postive
[truncated: 20,305 more rows]
